# Supplementary material for: Measurement Report: Ten-year trend of PM 2.5 major components and source tracers from 2008 to 2017 in an urban site of Hong Kong, China
Source: Copernicus journal article supplement (doi:10.5194/acp-2022-100), 2022-03-07
Supplement: Supplementary file 1 [file acp-2022-100-supplement.pdf]

## Supporting materials

### Ten-year trend of PM<sub>2.5</sub> major components and source tracers from 2008 to 2017 in an urban site of Hong Kong, China

Wing Sze Chow<sup>a</sup>, Kezheng Liao<sup>a</sup>, X. H. Hilda Huang<sup>b</sup>, Ka Fung Leung<sup>b</sup>, Alexis K. H. Lau<sup>b</sup>, Jian Zhen Yu<sup>a,b</sup>

5   <sup>a</sup>Department of Chemistry, <sup>b</sup>Division of Environment & Sustainability, The Hong Kong University of Science and Technology, Clear Water Bay, Kowloon, Hong Kong, China

This document contains

|    |                                                                                                                                                                              |                                     |
|----|------------------------------------------------------------------------------------------------------------------------------------------------------------------------------|-------------------------------------|
|    | <b>S1. Site information - The meteorological information, traffic flow in Tsuen Wan .....</b>                                                                                | <b>2</b>                            |
|    | Figure S1 – Temperature, wind speed & direction, and precipitation in Tsuen Wan from 2008 to 2017. .2                                                                        |                                     |
| 10 | Figure S2 – The traffic flow in Shing Mun Tunnel .....                                                                                                                       | 2                                   |
|    | <b>S2. Supplemental tables and figures related to PM<sub>2.5</sub> chemical composition data.....</b>                                                                        | <b>3</b>                            |
|    | Figure S3. Time series of individual samples collected in the decade of 2008-2017.....                                                                                       | 3                                   |
|    | Figure S4 – Seasonal variation of gaseous and particle pollutants from 2008 to 2017. ....                                                                                    | 4                                   |
|    | Figure S5 – QQ plots of gaseous and particles species from 2008 to 2017.....                                                                                                 | 5                                   |
| 15 | Figure S6 – QQ plots of gaseous and particles species with log-transformation.....                                                                                           | 6                                   |
|    | Figure S7 – Correlation of hourly-measured As and Se with Pb concentrations at a suburban site of Hong Kong for the period of August 2019 to February 2021.....              | <b>Error! Bookmark not defined.</b> |
|    | <b>S3. Methodology of Seasonal and Trend Decomposition with Loess Method and the Generalized Least Squares with Autoregressive-Moving Average model (STL-GLS-ARMA) .....</b> | <b>8</b>                            |
| 20 | Figure S8 – ACF plots of gaseous and particle pollutants.....                                                                                                                | 10                                  |
|    | Figure S9 – PACF plots of gaseous and particle pollutants.....                                                                                                               | 11                                  |
|    | Table S1. Summary of the ARMA model results .....                                                                                                                            | 12                                  |
|    | <b>S4. Application of ordinary least square (OLS) and annual averaging on autocorrelated time series .....</b>                                                               | <b>13</b>                           |
| 25 | Table S2. Summary of slope and intercept determined by OLS and GLS-ARMA methods.....                                                                                         | 14                                  |
|    | Figure S10 – Residual plots of OLS method for gaseous and particle pollutants.....                                                                                           | 15                                  |
|    | Table S3. Summary of annual averaged concentration and estimated value by GLS-ARMA in 2008 and 2017. ....                                                                    | 16                                  |
|    | <b>S5. Trend determination with different time intervals.....</b>                                                                                                            | <b>17</b>                           |
| 30 | Table S4. Summary of slope and intercept with time series in different time intervals. ....                                                                                  | 17                                  |
|    | <b>S6. The overall compound annual average results (CAGR) of all species. ....</b>                                                                                           | <b>18</b>                           |
|    | Figure S11 – CAGR of all the pairwise combinations in each species from 2008 to 2017.....                                                                                    | 19                                  |
|    | <b>S7. ENSO events.....</b>                                                                                                                                                  | <b>20</b>                           |
| 35 | Table S6. Summary of ENSO events from 2008 to 2017 as neutral, weak, moderate, strong, and very strong events.....                                                           | 20                                  |
|    | Figure S12 – The changes of wind direction and wind speed under different levels of ENSO events.....                                                                         | 20                                  |
|    | Table S7. Summary of the multiple linear regression of the time series of gaseous and particles pollutants. ....                                                             | 21                                  |
|    | <b>S8. Emissions controlling policies implemented in Hong Kong.....</b>                                                                                                      | <b>22</b>                           |
| 40 | Table S8 – Summary of local and co-governments regulations/policies.....                                                                                                     | 22                                  |

## S1. Site information - The meteorological information, traffic flow in Tsuen Wan

The daily meteorological condition from 2008 to 2017 in Tsuen Wan are summarized in Figure S1. From 2008 to 2017, all the meteorological factors were similar between years in which higher temperature ( $27.0 \pm 1.5^\circ\text{C}$ ) and relative humidity ( $86.6 \pm 7.2\%$ ) were generally observed in summer period. While the precipitation was higher in summer ( $107.9 \pm 226.0\text{ mm}$ ) than that in spring ( $47.2 \pm 127.4\text{ mm}$ ), fall ( $34.5 \pm 130.2\text{ mm}$ ) and winter ( $11.2 \pm 53.0\text{ mm}$ ). The 10-years traffic flow in Shing Mun Tunnel, which is  $\sim 5\text{ km}$  from the Tsuen Wan sampling site, is summarized in Figure S2.

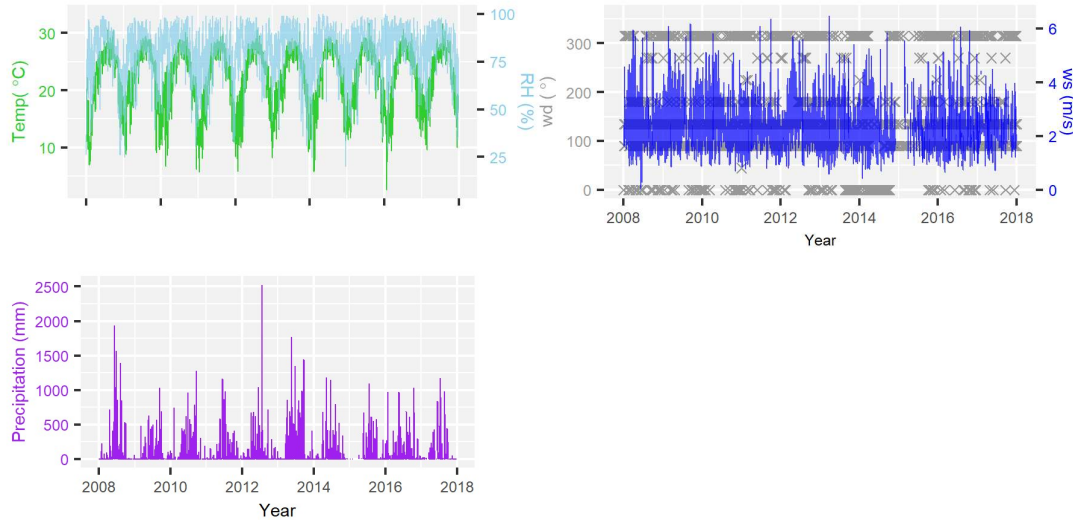

**Figure S1** – Temperature (top-left), wind speed & direction (top-right) and precipitation (left-bottom) in Tsuen Wan from 2008 to 2017.

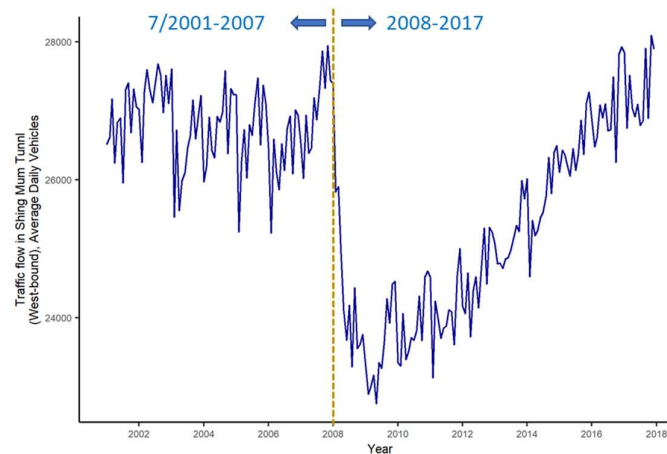

**Figure S2** – Traffic flow counts in Shing Mun Tunnel (West-bound: from Shatin to Tsuen Wan) from July 2001 to 2017. The sudden drop in traffic count in early 2008 coincided with the opening of Eagle's Nest tunnel in March 2008, which likely had diverted traffic from Shing Mun Tunnel.

## S2. Supplemental tables and figures related to PM<sub>2.5</sub> chemical composition data

The time series of individual samples are shown in Figure S3. The time series of seasonal averages for all the four seasons are shown in Figure S4.

60 One of the methods on testing whether the sample population is normal (Gaussian) distributed is quartile-quartile plot (Q-Q plot). The concentration of species was first ranked in increasing order and then calculated the respective z-value in normal distribution (e.g. the theoretical quartile of mean is 0). If a linear relationship is observed from concentration verse theoretical quartile, the sample is likely normal distributed. Where in our sample, a curve instead of a straight line was obtained in Q-Q plots (Figure S5). The Q-Q plots were  
65 improved after log transformation of the sample data (Figure S6), and thus the log transformed time series were used for the trend analysis.

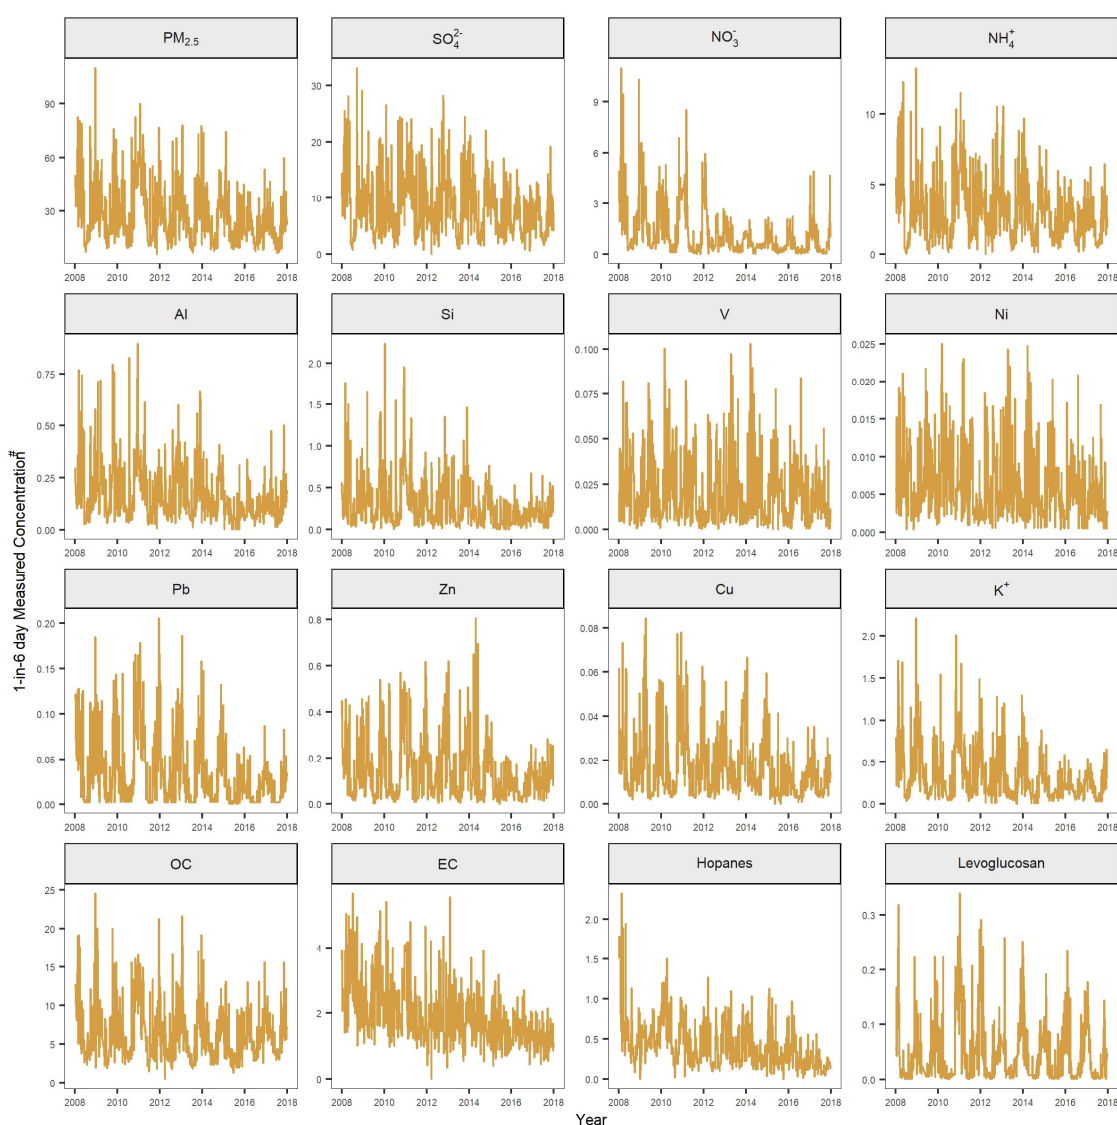

**Figure S3.** Time series of individual samples collected in the decade of 2008-2017.

(a)

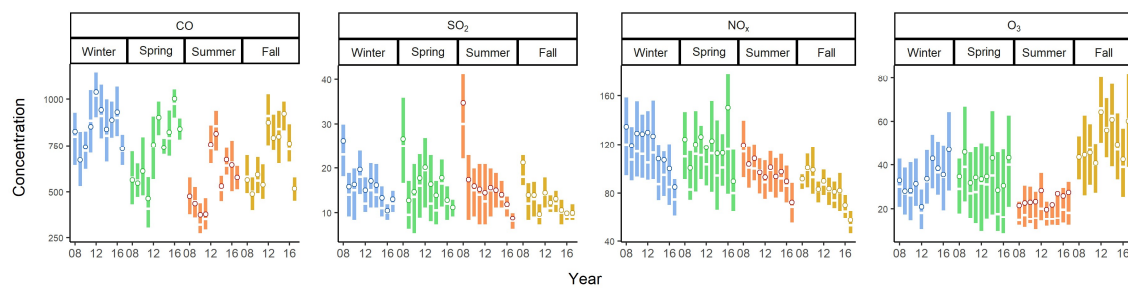

70

(b)

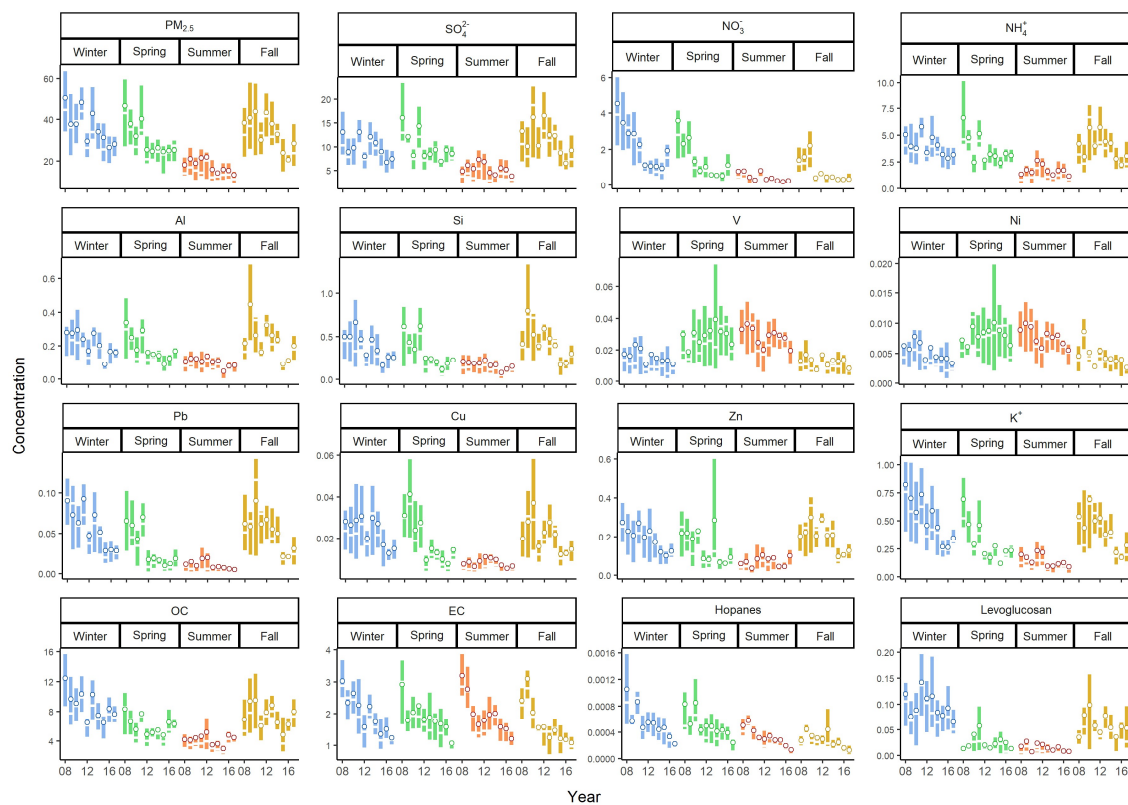

**Figure S4** – Seasonal variation of (a) gaseous and (b) particle pollutants from 2008 to 2017. The concentration of hopanes and levoglucosan are  $\text{ng/m}^3$ , while that of the remaining is  $\mu\text{g/m}^3$ .

75

(a)

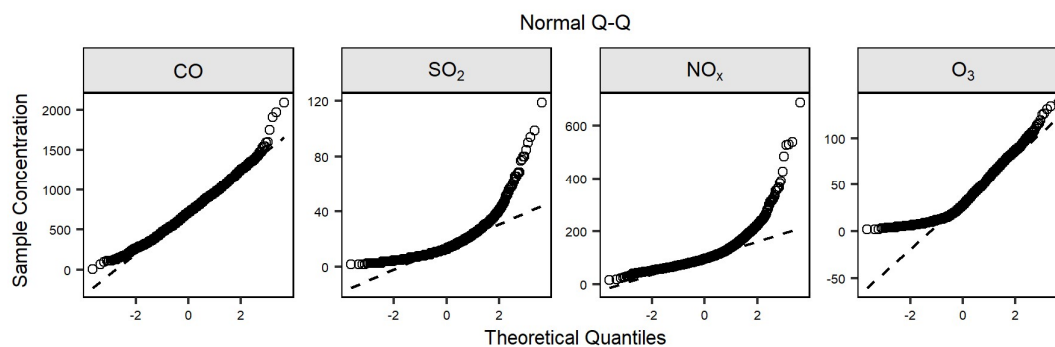

(b)

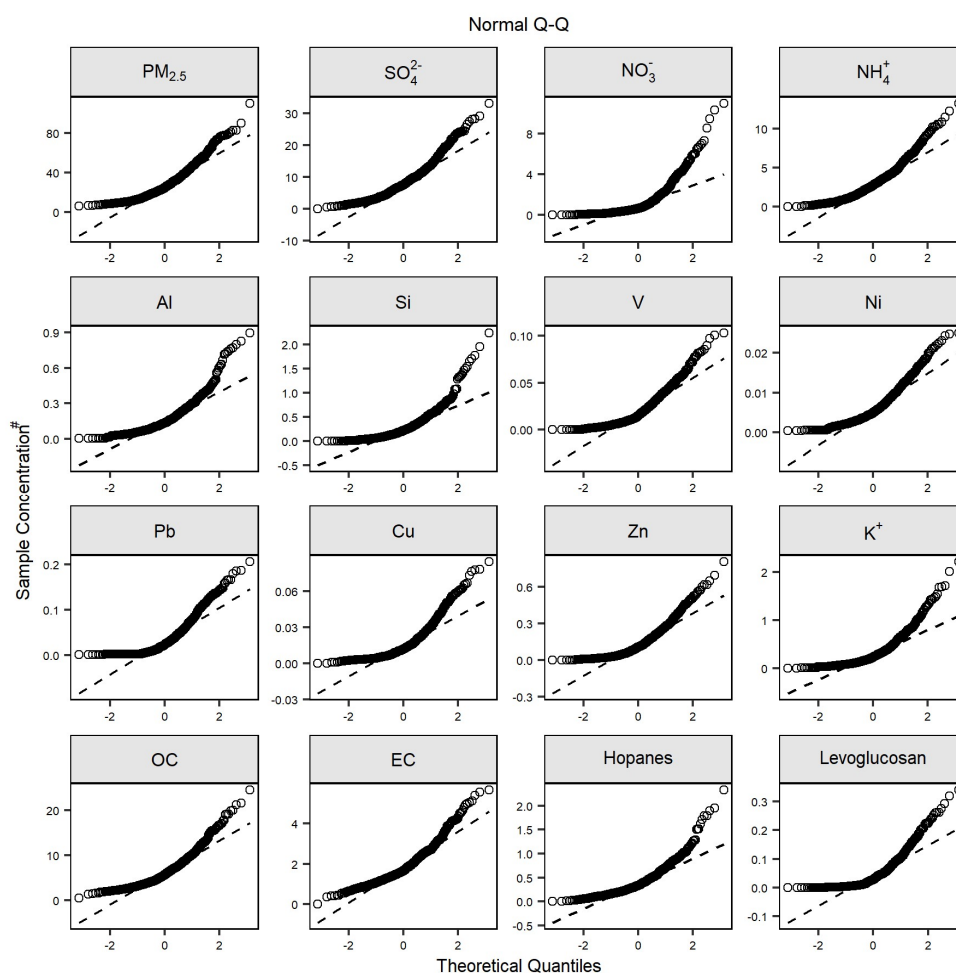

80 **Figure S5** – QQ plots of (a) gaseous and (b) PM<sub>2.5</sub> species from 2008 to 2017. Note that the concentration of hopanes and levoglucosan are ng/m<sup>3</sup>, while that of the remaining is µg/m<sup>3</sup>. QQ plots (quantile-quantile plots) are used to examine whether the data are compatible with a certain distribution by comparing its sample quantiles against its theoretical quantiles. The closer the data points fall along the straight dash line in the figure, the more likely they are statistically distributed as per assumptions. Here we compare the raw data to a theoretical normal distribution for each species.

85

(a)

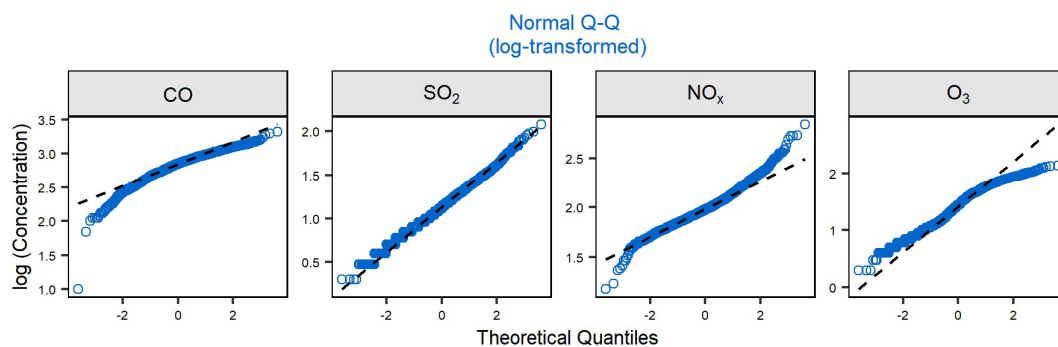

(b)

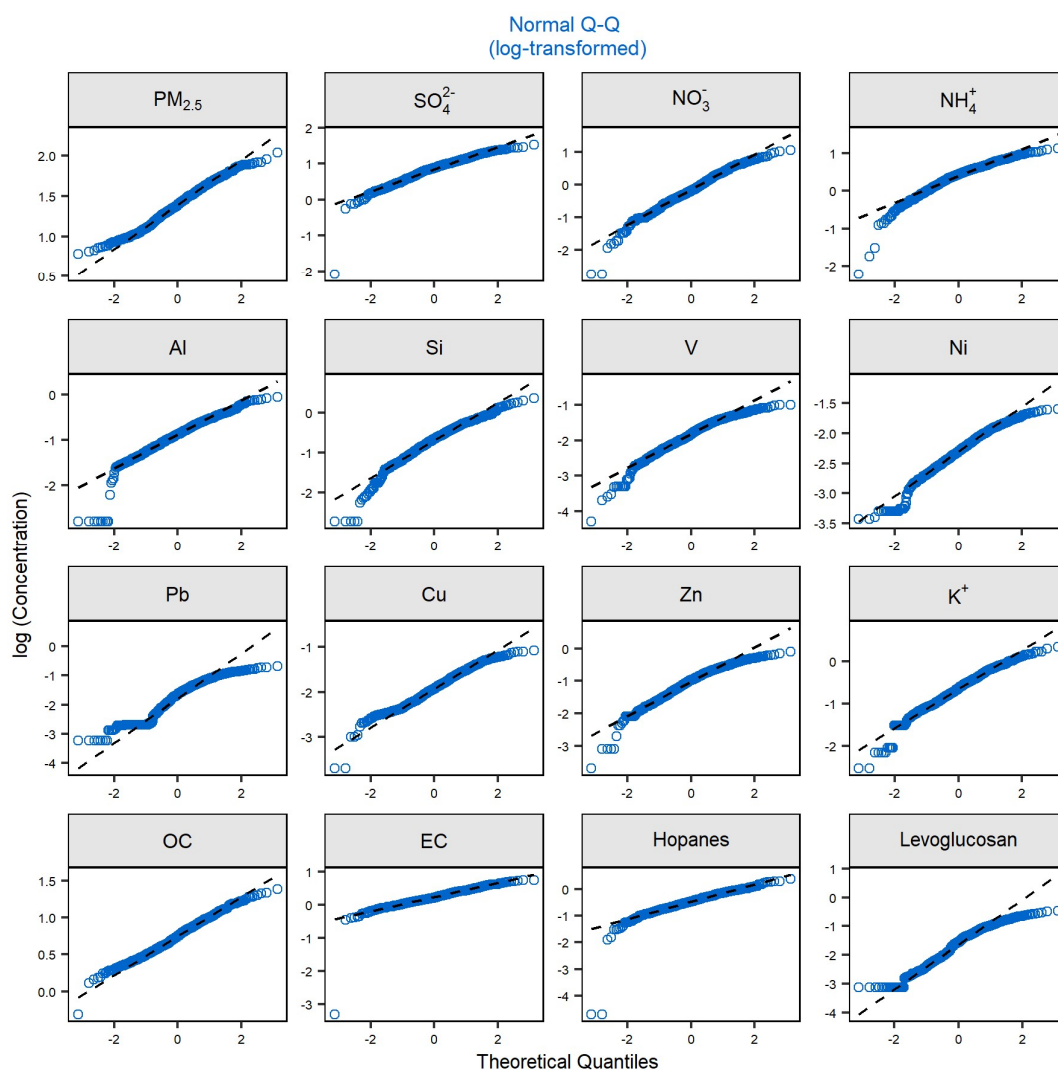

**Figure S6** – QQ plots of (a) gaseous and (b) PM<sub>2.5</sub> species with log-transformation from 2008 to 2017.

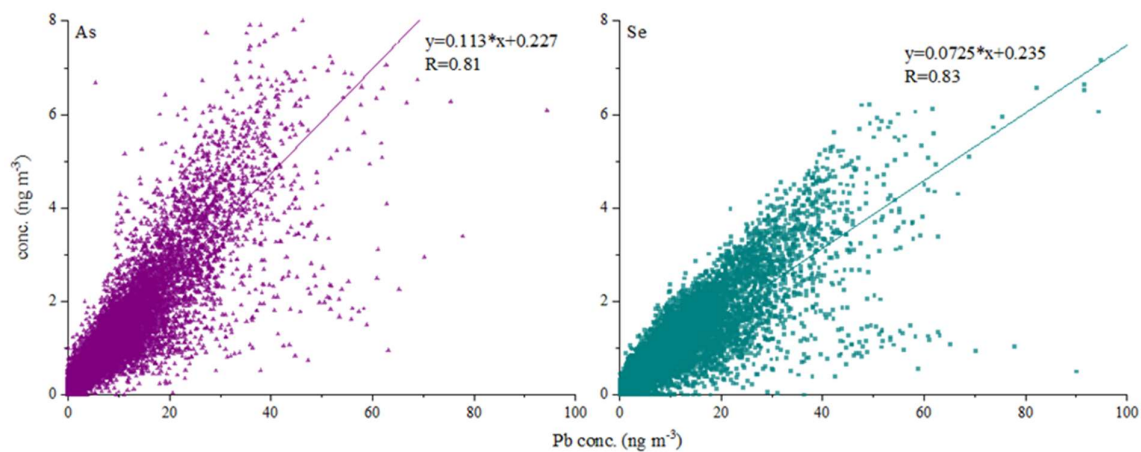

**Figure S7** – Correlation of hourly-measured As and Se with Pb concentrations at a suburban site of Hong Kong for the period of August 2019 to February 2021.

### S3. Methodology of Seasonal and Trend Decomposition with Loess Method and the Generalized Least Squares with Autoregressive-Moving Average model (STL-GLS-ARMA)

The Seasonal and Trend Decomposition can be operated in either additional or multiplicative relationship as shown in equation 1a and 1b.

$$Y_v = T_v + S_v + R_v \quad (1a)$$

$$Y_v = T_v \times S_v \times R_v \quad (1b)$$

Eq (1b) can also be written as:

$$\log(Y_v) = \log(T_v) + \log(S_v) + \log(R_v); Y'_v = T'_v + S'_v + R'_v \quad (1c)$$

where  $Y_v$ ,  $T_v$ ,  $S_v$ ,  $R_v$  is the output data, the trend, the seasonal and the remainder component respectively, for  $v = 1$  to  $N$ .

STL is optimized via locally weighted regression (typically the method LOcally Estimated Scatterplot Smoothing, LOESS) with weights  $\theta_v$  under two iterative loops, an inner loop nested inside an outer loop. Within the inner loop, the time series is first detrended with initially estimated trend component. Then, the detrended time series is smoothed by LOESS with the smoothing parameter for seasonal component  $n_s$  and  $d = 1$  under each cycle-subseries (e.g., Jan is the first cycle-subseries for monthly cycles):

$$\text{Step 1: } Y_v^{detrend} = Y_v - T_v^k, k \text{ is the order of run in inner loop} \quad (2)$$

$$\text{Step 2: } C_v^{k+1} \text{ as smoothed sub-cycle results from } Y_v^{detrend} \quad (3)$$

The third step in the inner loop is to compute a low-pass filter  $L_v^{k+1}$  from the locally weighted regression on three consecutive averaging means, which is later subtracted from the smoothed detrend sub-cycle results  $C_v^{k+1}$  (obtained from step two) so that a new seasonal component  $S_v^{k+1}$  is received.

$$\text{Step 3: } L_v^{k+1}, \text{ as low-pass filter} \quad (4)$$

$$\text{Step 4: } S_v^{k+1} = C_v^{k+1} - L_v^{k+1} \quad (5)$$

A new trend component  $T_v^{k+1}$  is deduced after deseasonalizing the time series with the new seasonal component  $S_v^{k+1}$  and performing LOESS with the smoothing parameter for trend component  $n_t$  and  $d=1$ .

$$\text{Step 5: } Y_v^{deseason} = Y_v - S_v^{k+1} \quad (6)$$

$$\text{Step 6: } T_v^{k+1}, \text{ as smoothed trend from } Y_v^{deseason} \quad (7)$$

After obtaining  $S_v^{k+1}$  and  $T_v^{k+1}$  from the inner loop, the remainder  $R_v$  can be calculated as shown in equation (8) in the outer loop, whence a robustness weights  $\rho_v$  is computed with respected to the  $R_v$  value. The inner loop is then repeated with the revised smoothing procedures including multiplication of  $\rho_v$  to the weights  $\theta_v$  in Loess in step two to six of the inner loop. The iterations of the inner and outer loop are carried out for a total of  $n_i$  and  $n_o$  times.

$$R_v = Y_v - T_v^{k+1} - S_v^{k+1} \quad (8)$$

$$\rho_v = B(|R_v|/h) \quad (9.1)$$

Where  $h$  and  $B(u)$  are defined by the following two equations:

$$h = 6 \text{ median}(|R_v|) \quad (9.2)$$

$$B(u) = \begin{cases} (1 - u^2)^2, & 0 \leq u < 1 \\ 0, & u \geq 1 \end{cases} \quad (9.3)$$



After the STL method, generalized least square with ARMA model is carried out for quantifying the trend components of time series. In a ARMA( $p, q$ ) model, it assumes that the current value ( $X_t$ ) is influenced by its  $p$ -order of lagged values ( $X_{t-h}$ ) and  $q$ -order of lagged residuals ( $\varepsilon_{t-i}$ ) as shown in equation 10.

$$X_t = \sum_{h=1}^p \phi_h X_{t-h} + \varepsilon_t + \sum_{i=1}^q \theta_i \varepsilon_{t-i} \quad (10)$$

Prior from directly running the model, autocorrelation issue on time series by Auto Correlation Function (ACF) and Partial ACF (PACF) was examined by visually examining Figure S8 & S9. If the calculated ACF/PACF exceed the threshold (blue dotted line), then this indicates the time series as autocorrelated. In our results, obvious autocorrelation with lagged values are observed for gaseous pollutants while autocorrelation of particle pollutants was higher with lagged residual (e.g., OC, EC, hopanes, etc.). After confirming the autocorrelation properties of the samples, order selection ( $p, q$  values) of ARMA( $p, q$ ) model can be achieved by minimizing penalized model selection criteria such as Akaike's information criterion (AIC), AIC bias corrected (AICc), and Bayesian information criterion (BIC) (Table S1). Both AIC and BIC are capable to quantify the overall influence of increasing order on likelihood and overfitting issue of a model. AIC assumes that a model can only optimally predict the results, whilst BIC considers a model as the true model only when it generated the observed data. Despite of the differences in assumptions, whichever model possesses the minimum AIC or BIC value is regarded as the most optimal. As AICc is the more restricted version of AIC, i.e., higher penalty acted with increasing order, AICc and AIC always align in the same sequence along the changes of model order. Thus, any model select by minimum AIC/AICc were denoted as AIC selected model in the table. In our results, there were 10 out of 20 species optimized in different ARMA models if using different selection criteria. However, only slight changes on the significant level of  $\text{SO}_4^-$  and  $\text{NH}_4^+$  were observed, the determined slope by order selection were not obviously varied along the models.

(a)

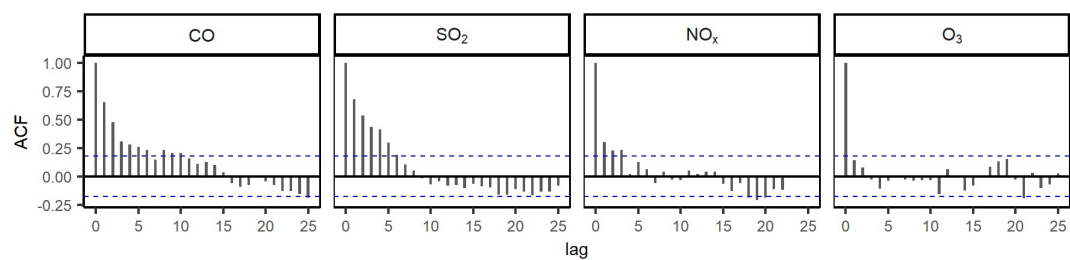

(b)

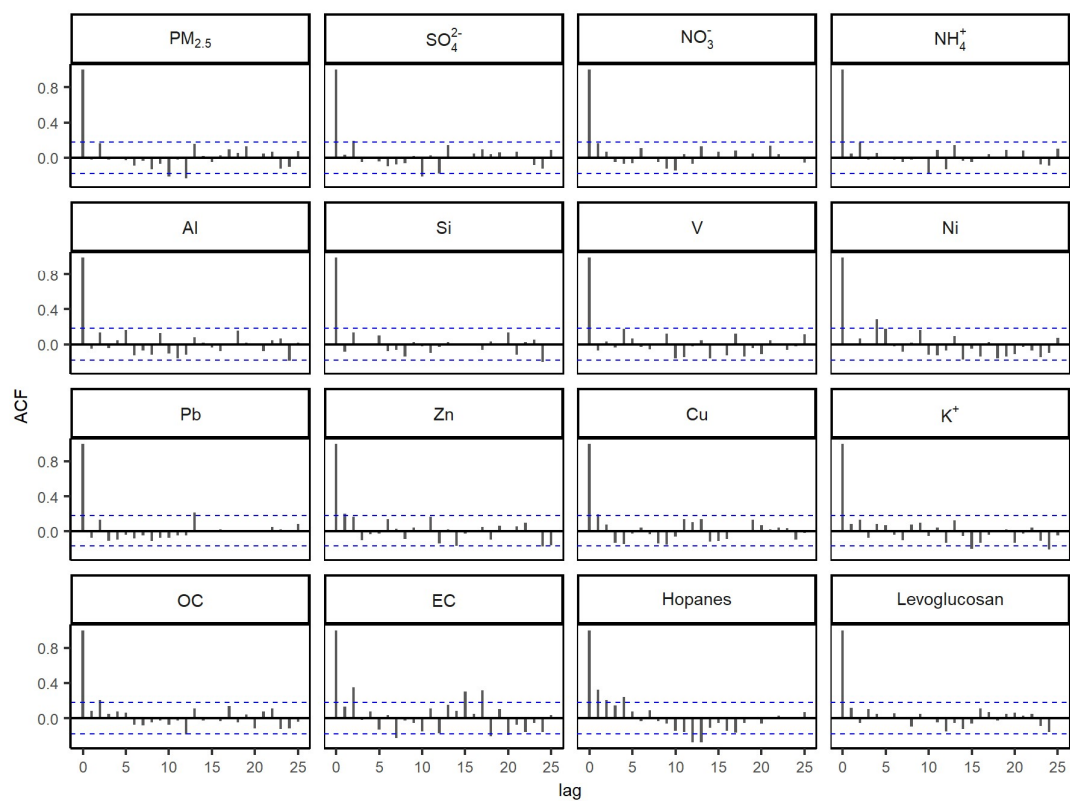

160 **Figure S8** – ACF plots of (a) gaseous and (b) particle pollutants.

(a)

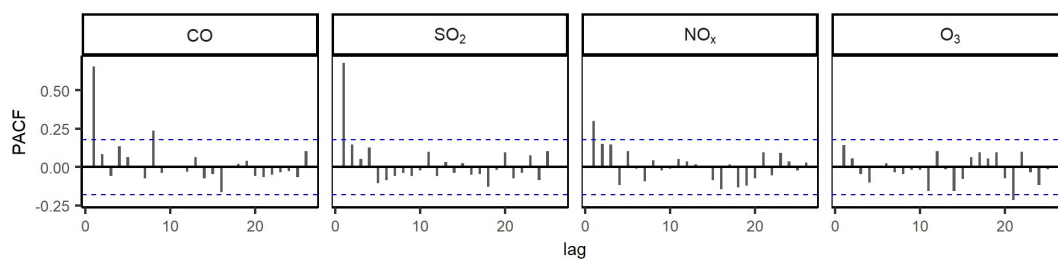

(b)

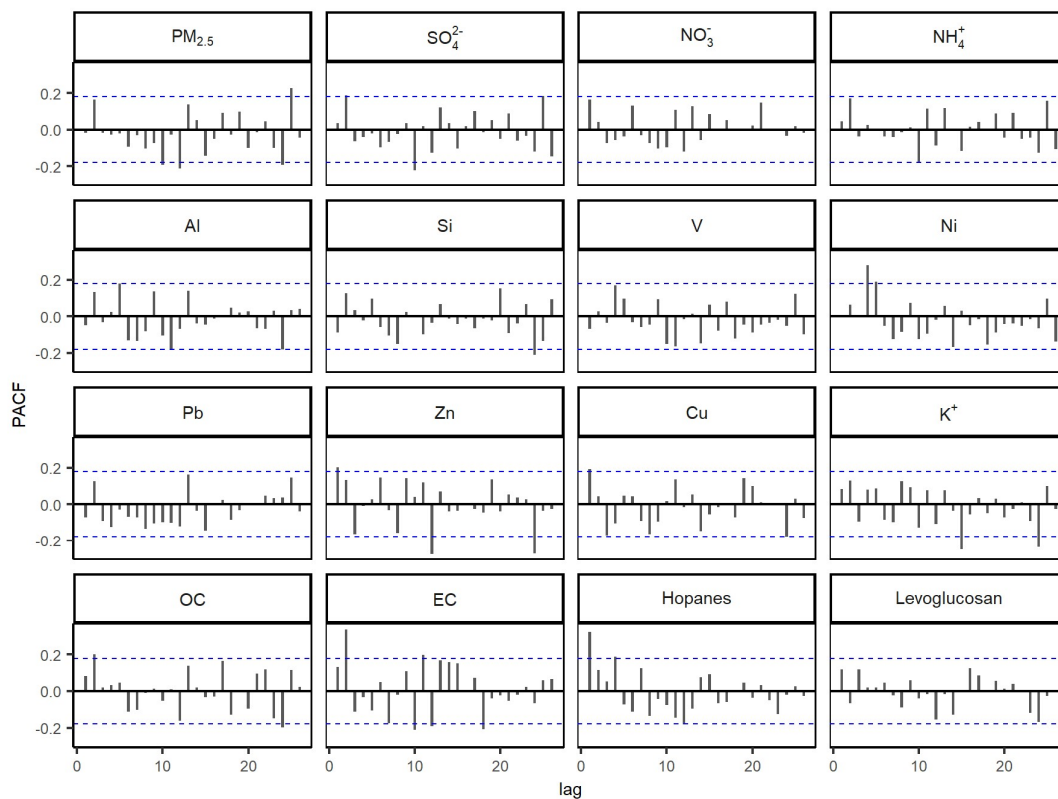

165

**Figure S9** –PACF plots of (a) gaseous and (b) particle pollutants.

**Table S1.** Summary of the ARMA model results, including minimum values among the information criteria, the respective selected model, exact value of the information criteria, slope and significant level determined from the model.

| Species                       | Min.<br>IC <sup>1</sup> | ARMA<br>model | AIC     | AICc    | BIC     | Slope <sup>2</sup> | Significant | Slope Diff <sup>3</sup>  |
|-------------------------------|-------------------------|---------------|---------|---------|---------|--------------------|-------------|--------------------------|
| <b>Gaseous pollutants</b>     |                         |               |         |         |         |                    |             |                          |
| CO                            | All                     | ARMR(1,0)     | 1481.7  | 1482    | 1492.8  | 20                 |             | <i>n.a.</i>              |
| SO <sub>2</sub>               | AIC                     | ARMR(1,1)     | 607.4   | 607.9   | 621.3   | -1.2               | ***         | 3.28 x 10 <sup>-02</sup> |
|                               | BIC                     | ARMR(1,0)     | 609.3   | 609.6   | 620.4   | -1.2               | ***         |                          |
| NO <sub>x</sub>               | AIC                     | ARMR(1,1)     | 942.7   | 943.2   | 956.6   | -3.6               | ***         | 1.06 x 10 <sup>-01</sup> |
|                               | BIC                     | ARMR(1,0)     | 944.7   | 945.1   | 955.9   | -3.5               | ***         |                          |
| O <sub>3</sub>                | All                     | ARMR(1,0)     | 822.9   | 823.3   | 834.1   | 0.95               | ***         | <i>n.a.</i>              |
| <b>Particle pollutants</b>    |                         |               |         |         |         |                    |             |                          |
| PM <sub>2.5</sub>             | AIC                     | ARMR(2,0)     | 818.4   | 818.9   | 832.3   | -1.5               | ***         | 1.06 x 10 <sup>-03</sup> |
|                               | BIC                     | ARMR(1,0)     | 819.6   | 820     | 830.8   | -1.5               | ***         |                          |
| SO <sub>4</sub> <sup>2-</sup> | AIC                     | ARMR(0,2)     | 602.3   | 602.8   | 616.2   | -0.36              | **          | 2.45 x 10 <sup>-04</sup> |
|                               | BIC                     | ARMR(1,0)     | 604.9   | 605.2   | 616     | -0.36              | ***         |                          |
| NO <sub>3</sub> <sup>-</sup>  | All                     | ARMR(1,0)     | 234.6   | 235     | 245.8   | -0.16              | ***         | <i>n.a.</i>              |
| NH <sub>4</sub> <sup>+</sup>  | AIC                     | ARMR(2,0)     | 402.3   | 402.8   | 416.2   | -0.12              | *           | 2.62 x 10 <sup>-04</sup> |
|                               | BIC                     | ARMR(1,0)     | 403.9   | 404.2   | 415     | -0.12              | **          |                          |
| Al                            | AIC                     | ARMR(2,2)     | -277.3  | -276.3  | -257.8  | -13                | ***         | 9.06 x 10 <sup>-02</sup> |
|                               | BIC                     | ARMR(1,0)     | -273.1  | -272.8  | -262    | -13                | ***         |                          |
| Si                            | All                     | ARMR(1,0)     | -115.4  | -115.1  | -104.3  | -27                | ***         | <i>n.a.</i>              |
| V                             | All                     | ARMR(1,0)     | -814.5  | -814.2  | -803.4  | -0.62              | **          | <i>n.a.</i>              |
| Ni                            | All                     | ARMR(1,0)     | -1130.9 | -1130.5 | -1119.7 | -0.29              | ***         | <i>n.a.</i>              |
| Pb                            | AIC                     | ARMR(0,2)     | -538.4  | -537.9  | -524.5  | -3.8               | ***         | 1.28 x 10 <sup>-02</sup> |
|                               | BIC                     | ARMR(1,0)     | -538.4  | -538    | -527.2  | -3.9               | ***         |                          |
| Zn                            | All                     | ARMR(2,2)     | -329.2  | -328.2  | -309.7  | -7.4               | **          | <i>n.a.</i>              |
| Cu                            | AIC                     | ARMR(2,2)     | -844.5  | -843.5  | -825    | -1.1               | ***         | 2.80 x 10 <sup>-03</sup> |
|                               | BIC                     | ARMR(1,0)     | -841    | -840.7  | -829.9  | -1.1               | ***         |                          |
| K <sup>+</sup>                | AIC                     | ARMR(2,2)     | -133.9  | -132.9  | -114.3  | -32                | ***         | 3.98 x 10 <sup>-02</sup> |
|                               | BIC                     | ARMR(1,0)     | -131.7  | -131.4  | -120.6  | -32                | ***         |                          |
| OC                            | All                     | ARMR(2,0)     | 462.5   | 463     | 476.4   | -0.18              | **          | <i>n.a.</i>              |
| EC                            | All                     | ARMR(0,2)     | 133.9   | 134.4   | 147.8   | -0.16              | ***         | <i>n.a.</i>              |
| Hopanes                       | AIC                     | ARMR(1,1)     | -1790.3 | -1789.7 | -1776.3 | -0.047             | ***         | 2.60 x 10 <sup>-03</sup> |
|                               | BIC                     | ARMR(1,0)     | -1788.8 | -1788.5 | -1777.7 | -0.044             | ***         |                          |
| Levoglucosan                  | All                     | ARMR(0,1)     | -586    | -585.6  | -575    | -1.4               | *           | <i>n.a.</i>              |

<sup>1</sup> AIC = both AIC and AICc

<sup>2</sup> Unit of Al, Si, V, Ni, Pb, Zn, Cu, K<sup>+</sup>, hopanes and levoglucosan is ngm<sup>-3</sup>yr<sup>-1</sup>, while the rest is µgm<sup>-3</sup>yr<sup>-1</sup>.

<sup>3</sup> Slope difference = |Slope 1 – Slope 2|; *n.a.* denote not applicable.

Asterisks denote for the significance of slope differ from zero: \* *p* < 0.05, \*\* *p* < 0.01, \*\*\* *p* < 0.001.

#### **S4. Application of ordinary least square (OLS) and annual averaging on autocorrelated time series**

After extracting the trend component by STL method, OLS instead of GLS-ARMA method was applied in this section for comparison purpose. The slope and the significant level estimated from both methods were almost the same, except for CO where significant rise was obtained with  $25 \mu\text{g}/\text{m}^3$  per year (Table S2). The residual plots from OLS methods (Figure S10) were generally less random distributed and more fluctuated (e.g., CO, SO<sub>2</sub>, K<sup>+</sup>, NO<sub>3</sub><sup>-</sup>). This revealed the importance of validating quantification methods on temporal variation in which the random and constant variance assumptions of OLS was proved incorreced in this study.

Concentration estimated by GLS-ARMA results were found generally smaller than annual averaged values. %Changes of species temporal variations were not differing from the methods when similar discrepancies in initial (Year, 2008) and end points (Year, 2017) were resulted (Table S3). For the species with diminished decline in later years such as K<sup>+</sup>, NO<sub>3</sub><sup>-</sup>, Al, Si, Pb and Cu, the determined slope from GLS-ARMA were dominated by the reduction of first continuous decline period which led to underestimated concentration in 2017. The %difference of estimated concentration in 2017 ranged from -69.2% to 18.2% whereas the %difference in 2008 were generally smaller with -32.8% to 8.7%. Consequently, the %changes of species by GLS-ARMA were higher than that from annual averaged method. Apart from this problem, GLS-ARMA is a better method for trend quantification owing to the higher degree of freedom in the calculation.

**Table S2.** Summary of slope and intercept determined by OLS and GLS-ARMA methods.

| Species                       | unit                                | ARMA model | Slope                       |                             | Intercept |      |
|-------------------------------|-------------------------------------|------------|-----------------------------|-----------------------------|-----------|------|
|                               |                                     |            | GLS-ARMA <sup>1</sup>       | OLS <sup>1</sup>            | GLS-ARMA  | OLS  |
| Gaseous pollutants            |                                     |            |                             |                             |           |      |
| CO                            | µg m <sup>-3</sup> yr <sup>-1</sup> | ARMR(1,0)  | 20, (-0.84, 40)             | 25***, (15, 34)             | 590       | 570  |
| SO <sub>2</sub>               | µg m <sup>-3</sup> yr <sup>-1</sup> | ARMR(1,0)  | -1.2***, (-1.8, -0.65)      | -1.2***, (-1.5, -0.96)      | 22        | 22   |
| NO <sub>x</sub>               | µg m <sup>-3</sup> yr <sup>-1</sup> | ARMR(1,0)  | -3.5***, (-4.6, -2.4)       | -3.5***, (-4.3, -2.7)       | 120       | 120  |
| O <sub>3</sub>                | µg m <sup>-3</sup> yr <sup>-1</sup> | ARMR(1,0)  | 0.95***, (0.42, 1.5)        | 0.93***, (0.47, 1.4)        | 28        | 28   |
| Particle pollutants           |                                     |            |                             |                             |           |      |
| PM <sub>2.5</sub>             | µg m <sup>-3</sup> yr <sup>-1</sup> | ARMR(1,0)  | -1.5***, (-1.9, -1.1)       | -1.5***, (-2, -1.1)         | 35        | 35   |
| SO <sub>4</sub> <sup>2-</sup> | µg m <sup>-3</sup> yr <sup>-1</sup> | ARMR(1,0)  | -0.36***, (-0.55, -0.17)    | -0.36***, (-0.54, -0.17)    | 10        | 10   |
| NO <sub>3</sub> <sup>-</sup>  | µg m <sup>-3</sup> yr <sup>-1</sup> | ARMR(1,0)  | -0.16***, (-0.21, -0.12)    | -0.17***, (-0.21, -0.13)    | 1.8       | 1.8  |
| NH <sub>4</sub> <sup>+</sup>  | µg m <sup>-3</sup> yr <sup>-1</sup> | ARMR(1,0)  | -0.12**, (-0.21, -0.039)    | -0.12**, (-0.2, -0.043)     | 3.6       | 3.6  |
| Al                            | ng m <sup>-3</sup> yr <sup>-1</sup> | ARMR(1,0)  | -13***, (-17, -8)           | -13***, (-17, -7.8)         | 230       | 230  |
| Si                            | ng m <sup>-3</sup> yr <sup>-1</sup> | ARMR(1,0)  | -27***, (-36, -19)          | -27***, (-36, -18)          | 420       | 420  |
| V                             | ng m <sup>-3</sup> yr <sup>-1</sup> | ARMR(1,0)  | -0.62**, (-1.1, -0.16)      | -0.62*, (-1.1, -0.13)       | 23        | 23   |
| Ni                            | ng m <sup>-3</sup> yr <sup>-1</sup> | ARMR(1,0)  | -0.29***, (-0.43, -0.16)    | -0.29***, (-0.43, -0.16)    | 7.6       | 7.6  |
| Pb                            | ng m <sup>-3</sup> yr <sup>-1</sup> | ARMR(1,0)  | -3.9***, (-5.3, -2.4)       | -3.9***, (-5.4, -2.3)       | 49        | 49   |
| Zn                            | ng m <sup>-3</sup> yr <sup>-1</sup> | ARMR(2,2)  | -7.4**, (-12, -2.6)         | -7.2***, (-11, -3.1)        | 170       | 160  |
| Cu                            | ng m <sup>-3</sup> yr <sup>-1</sup> | ARMR(1,0)  | -1.1***, (-1.7, -0.59)      | -1.1***, (-1.6, -0.69)      | 21        | 21   |
| K <sup>+</sup>                | ng m <sup>-3</sup> yr <sup>-1</sup> | ARMR(1,0)  | -32***, (-41, -23)          | -32***, (-41, -24)          | 460       | 460  |
| OC                            | µg m <sup>-3</sup> yr <sup>-1</sup> | ARMR(2,0)  | -0.18**, (-0.32, -0.047)    | -0.18***, (-0.28, -0.075)   | 7.1       | 7.1  |
| EC                            | µg m <sup>-3</sup> yr <sup>-1</sup> | ARMR(0,2)  | -0.16***, (-0.2, -0.13)     | -0.17***, (-0.19, -0.14)    | 2.7       | 2.7  |
| Hopanes                       | ng m <sup>-3</sup> yr <sup>-1</sup> | ARMR(1,0)  | -0.044***, (-0.057, -0.031) | -0.043***, (-0.052, -0.033) | 0.62      | 0.61 |
| Levoglucosan                  | ng m <sup>-3</sup> yr <sup>-1</sup> | ARMR(0,1)  | -1.4*, (-2.7, -0.077)       | -1, (-4.2, 2.2)             | 42        | 45   |

<sup>1</sup> Asterisks denote the slope significantly different from zero: \* p < 0.05, \*\* p < 0.01, \*\*\* p < 0.001.

(a)

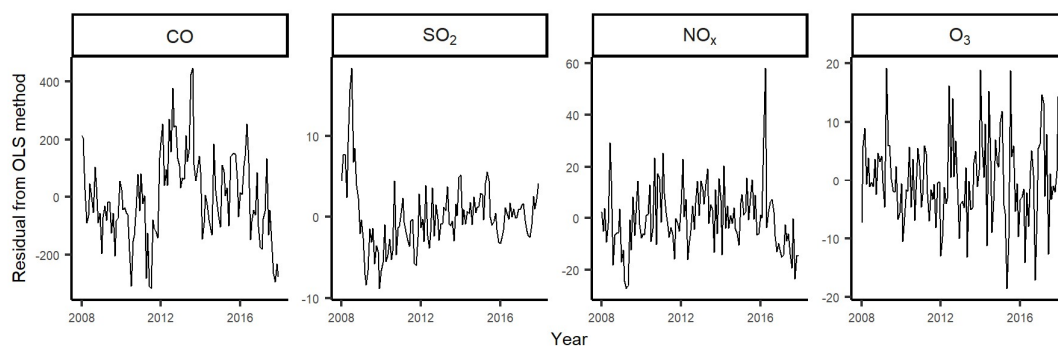

(b)

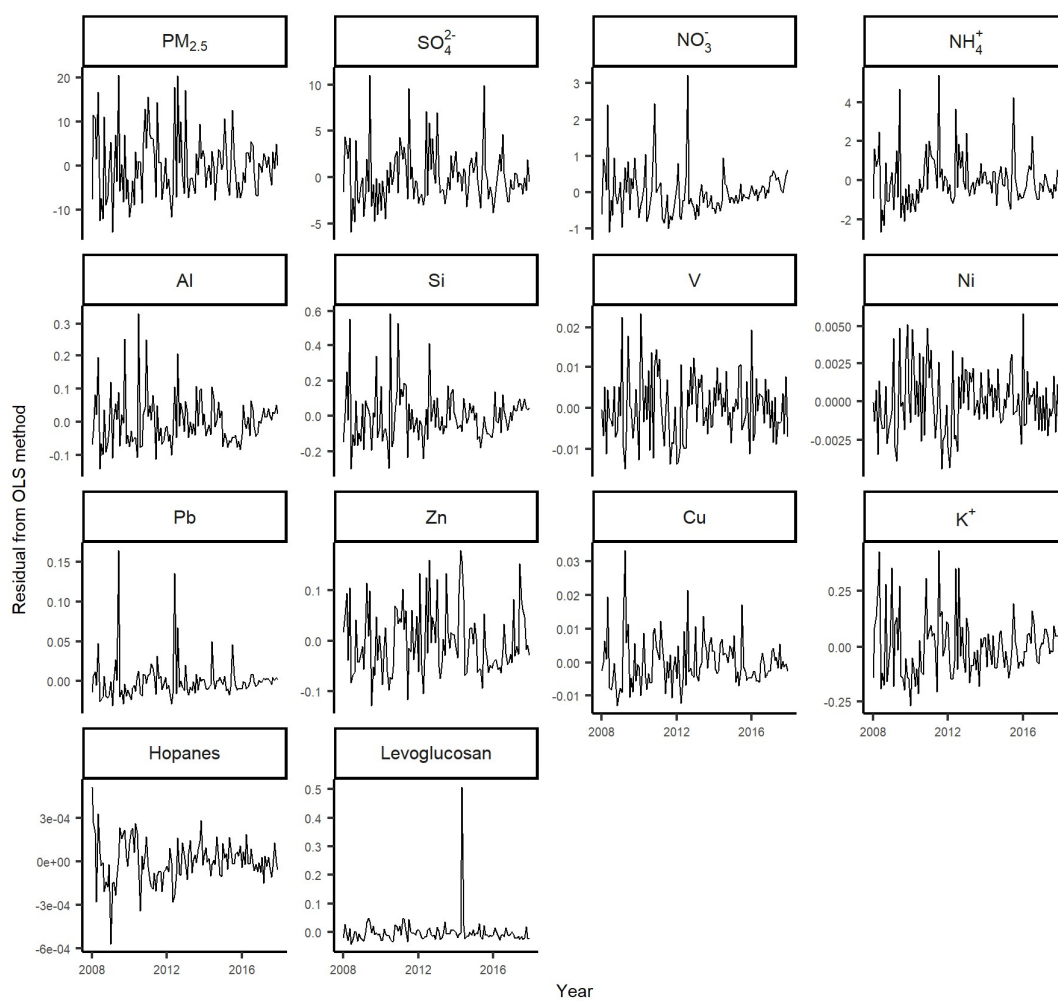

195 **Figure S10** – Residual plots of OLS method for (a) gaseous and (b) particle pollutants.

**Table S3.** Summary of annual averaged concentration and estimated value by GLS-ARMA in 2008 and 2017.

| Species                       | Concentration in 2008 |                 | Concentration in 2017 |                 | %Diff in methods <sup>1</sup> |        |
|-------------------------------|-----------------------|-----------------|-----------------------|-----------------|-------------------------------|--------|
|                               | GLS-ARMA              | Annual averaged | GLS-ARMA              | Annual averaged | 2008                          | 2017   |
| <b>Gaseous pollutants</b>     |                       |                 |                       |                 |                               |        |
| CO                            | 610                   | 620             | 780                   | 660             | -1.6%                         | 18.2%  |
| SO <sub>2</sub>               | 21                    | 28              | 10                    | 11              | -25.0%                        | -9.1%  |
| NO <sub>x</sub>               | 120                   | 120             | 88                    | 77              | 0.0%                          | 14.3%  |
| O <sub>3</sub>                | 28                    | 31              | 37                    | 42              | -9.7%                         | -11.9% |
| <b>Particle pollutants</b>    |                       |                 |                       |                 |                               |        |
| PM <sub>2.5</sub>             | 34                    | 37              | 21                    | 22              | -8.1%                         | -4.5%  |
| SO <sub>4</sub> <sup>2-</sup> | 9.8                   | 11              | 6.6                   | 6.6             | -10.9%                        | 0.0%   |
| NO <sub>3</sub> <sup>-</sup>  | 1.8                   | 2.6             | 0.28                  | 0.91            | -30.8%                        | -69.2% |
| NH <sub>4</sub> <sup>+</sup>  | 3.5                   | 4               | 2.4                   | 2.4             | -12.5%                        | 0.0%   |
| Al                            | 220                   | 220             | 110                   | 140             | 0.0%                          | -21.4% |
| Si                            | 410                   | 410             | 160                   | 220             | 0.0%                          | -27.3% |
| V                             | 23                    | 24              | 17                    | 16              | -4.2%                         | 6.3%   |
| Ni                            | 7.5                   | 6.9             | 4.8                   | 4.5             | 8.7%                          | 6.7%   |
| Pb                            | 47                    | 57              | 12                    | 19              | -17.5%                        | -36.8% |
| Zn                            | 160                   | 190             | 96                    | 110             | -15.8%                        | -12.7% |
| Cu                            | 21                    | 21              | 10                    | 12              | 0.0%                          | -16.7% |
| K <sup>+</sup>                | 440                   | 560             | 160                   | 220             | -21.4%                        | -27.3% |
| OC                            | 7                     | 8.2             | 5.4                   | 6.3             | -14.6%                        | -14.3% |
| EC                            | 2.7                   | 2.9             | 1.2                   | 1.2             | -6.9%                         | 0.0%   |
| Hopanes                       | 0.60                  | 0.71            | 0.21                  | 0.18            | -15.5%                        | 16.7%  |
| Levoglucosan                  | 41                    | 61              | 29                    | 33              | -32.8%                        | -12.1% |

<sup>1</sup> Percent difference is the relative difference of concentration estimated by two methods [(GLS-ARMA - Annual averaged) ÷ Annual method x 100%]



## S5. Trend determination with different time intervals

From the STL trend component and different %changes in annual averaged and GLS-ARMA methods, the time series of some species were found not always monotonically decreasing. To study the exact period of decline in certain species ( $K^+$ ,  $NO_3^-$ , Al, Si, V, Ni, Pb, Zn and Cu), five additional time intervals (2008-2016, 2008-2015, 2008-2014, 2014-2017 & 2015-2017) were analyzed with STL-GLS-ARMA method (Table S4). For the reference species EC with consistent decline from 2008-2017, the slope and intercept remained nearly unchanged in all time intervals. On the contrast, the changes of slope and intercept among time intervals before and after 2014 were significant for the rest of species. For  $K^+$  and  $NO_3^-$ , the reduction increased when removing data from 2015-2017 (i.e., only include 2008-2014) and no significant trend was observed in 2014/2015-2017 time intervals, showing that the decline was stronger in early state and was getting flatten in later year. The declines of Al and Si were also weaker in later years and even a rise was found in the 2015-2017 period while the temporal variations of industrial tracers Pb, Zn and Cu were relatively stable in the earlier period with weaker decline started from 2015. The situation was opposite for ship emitted V and Ni where significant and stronger reduction was obtained after 2015, possibly owing to the implementation of policy in 2015 which restrict marine vessels using clear fuel in Hong Kong waters.

**Table S4.** Summary of slope and intercept (in bracket) with time series in different time intervals.

| Species  | Slope <sup>1</sup> (Intercept) in different time intervals |                   |                   |                   |                    |                   |
|----------|------------------------------------------------------------|-------------------|-------------------|-------------------|--------------------|-------------------|
|          | 2008-2017                                                  | 2008-2016         | 2008-2015         | 2008-2014         | 2014-2017          | 2015-2017         |
| EC       | -0.16***<br>(2.7)                                          | -0.16***<br>(2.7) | -0.18***<br>(2.8) | -0.18***<br>(2.8) | -0.18***<br>(2.9)  | -0.14***<br>(2.6) |
| $K^+$    | -32***<br>(460)                                            | -35***<br>(470)   | -38***<br>(480)   | -36***<br>(470)   | -14<br>(320)       | -0.88<br>(200)    |
| $NO_3^-$ | -0.16***<br>(1.8)                                          | -0.19***<br>(1.9) | -0.21***<br>(2)   | -0.22***<br>(2)   | -0.00035<br>(0.55) | 0.055<br>(0.055)  |
| Al       | -13***<br>(230)                                            | -14***<br>(230)   | -15***<br>(230)   | -8.5*<br>(220)    | -4.8<br>(160)      | 24<br>(-96)       |
| Si       | -27***<br>(420)                                            | -31***<br>(430)   | -33***<br>(440)   | -25**<br>(420)    | -4<br>(230)        | 30<br>(-80)       |
| Pb       | -3.9***<br>(49)                                            | -3.9***<br>(49)   | -3.8**<br>(48)    | -3.3*<br>(47)     | -3.6*<br>(46)      | -1.9*<br>(31)     |
| Zn       | -7.4**<br>(170)                                            | -9**<br>(170)     | -6.8<br>(160)     | -1.8<br>(150)     | -11<br>(190)       | 14<br>(-25)       |
| Cu       | -1.1***<br>(21)                                            | -1.2***<br>(21)   | -0.92*<br>(21)    | -0.62<br>(20)     | -1.8*<br>(27)      | -0.79<br>(17)     |
| V        | -0.62**<br>(23)                                            | -0.42<br>(22)     | -0.54<br>(23)     | -0.49<br>(23)     | -1.8**<br>(33)     | -2.1**<br>(36)    |
| Ni       | -0.29***<br>(7.6)                                          | -0.25**<br>(7.4)  | -0.26*<br>(7.5)   | -0.25<br>(7.4)    | -0.54**<br>(9.5)   | -0.84***<br>(12)  |

<sup>1</sup>The unit of EC and  $NO_3^-$  is  $\mu g m^{-3} yr^{-1}$ , and other species in  $ng m^{-3} yr^{-1}$ . Asterisks denote slope values significantly different from zero: \*  $p < 0.05$ , \*\*  $p < 0.01$ , \*\*\*  $p < 0.001$ .

## S6. The overall compound annual average results (CAGR) of all species.

The table below shows the summary results of the CAGR method and comparison with the GLS-ARMA method.

220 **Table S5.** Summary of the CAGR from annual averaged time series.

| Species                                | CAGR  | %Relative change per year<br>GLS-ARMA | Difference <sup>1</sup> |
|----------------------------------------|-------|---------------------------------------|-------------------------|
| <b>Gaseous pollutants</b>              |       |                                       |                         |
| CO                                     | 3.2%  | 3.3%                                  | -0.1%                   |
| SO <sub>2</sub>                        | -5.1% | -5.6%                                 | 0.5%                    |
| NO <sub>x</sub>                        | -2.6% | -2.9%                                 | 0.3%                    |
| O <sub>3</sub>                         | 2.4%  | 3.5%                                  | -1.1%                   |
| <b>PM<sub>2.5</sub> and components</b> |       |                                       |                         |
| PM <sub>2.5</sub>                      | -5.7% | -4.3%                                 | -1.4%                   |
| SO <sub>4</sub> <sup>2-</sup>          | -5.1% | -3.6%                                 | -1.5%                   |
| NO <sub>3</sub> <sup>-</sup>           | -19%  | -9.0%                                 | -10%                    |
| NH <sub>4</sub> <sup>+</sup>           | -4.4% | -3.4%                                 | -1%                     |
| Al                                     | -5.8% | -5.5%                                 | -0.3%                   |
| Si                                     | -9.0% | -6.5%                                 | -2.5%                   |
| V                                      | -2.8% | -2.7%                                 | -0.1%                   |
| Ni                                     | -4.8% | -3.9%                                 | -0.9%                   |
| Pb                                     | -13%  | -7.9%                                 | -5.1%                   |
| Zn                                     | -7.1% | -4.5%                                 | -2.6%                   |
| Cu                                     | -8.0% | -5.4%                                 | -2.6%                   |
| K <sup>+</sup>                         | -11%  | -7.0%                                 | -4%                     |
| OC                                     | -3.0% | -2.6%                                 | -0.4%                   |
| EC                                     | -8.4% | -6.0%                                 | -2.4%                   |
| Hopanes                                | -12%  | -7.1%                                 | -4.9%                   |
| Levoglucosan                           | -4.9% | -3.3%                                 | -1.6%                   |

<sup>1</sup>Difference of percent relative change is calculated from the two methods (CAGR – GLS-ARMA)

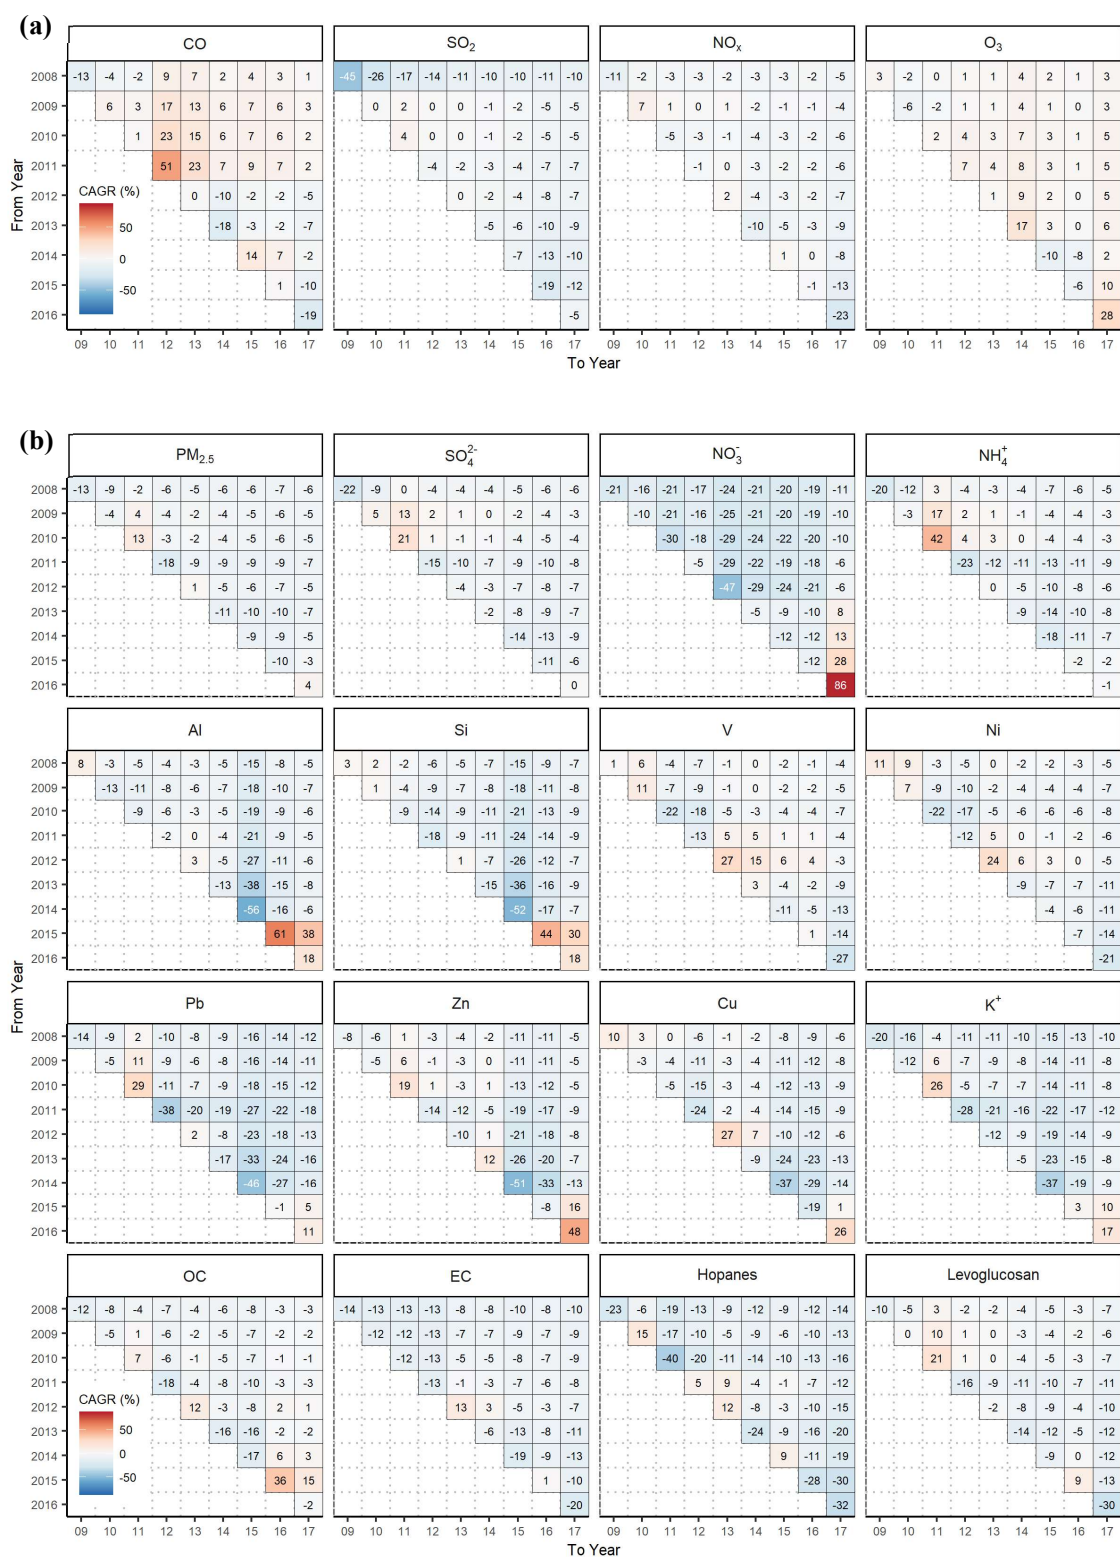

**Figure S11 – CAGR of all the pairwise combinations in each species from 2008 to 2017.**

S7. ENSO events

Occurrence of ENSO is summarized in Table S6. And the respective influences of ENSO events on wind components are summarized in Figure S11. The coefficients of all the MLR variables are summarized in Table S6.

**Table S6.** Summary of ENSO events from 2008 to 2017 as neutral, weak, moderate, strong, and very strong events.

| El Niño/La Niña event | Occurring period    | Season          | Strength    |
|-----------------------|---------------------|-----------------|-------------|
| El Niño #1            | 08. 2009 – 10. 2009 | Summer – Fall   | Weak        |
|                       | 11. 2009 – 12. 2009 | Winter – Winter | Moderate    |
|                       | 01. 2010 – 01. 2010 | Winter – Winter | Strong      |
|                       | 02. 2010 – 03. 2010 | Winter – Spring | Moderate    |
|                       | 04. 2010 – 05. 2010 | Spring – Summer | Weak        |
| El Niño #2            | 11. 2014 – 05. 2015 | Winter – Summer | Weak        |
|                       | 06. 2015 – 07. 2015 | Summer – Summer | Moderate    |
|                       | 08. 2015 – 09. 2015 | Summer – Fall   | Strong      |
|                       | 10. 2015 – 03. 2016 | Fall – Spring   | Very Strong |
|                       | 04. 2016 – 04. 2016 | Spring – Spring | Strong      |
|                       | 05. 2016 – 05. 2016 | Summer – Summer | Moderate    |
| LaNiña #1             | 01. 2008 – 01. 2008 | Winter – Winter | Moderate    |
|                       | 02. 2008 – 03. 2008 | Winter – Spring | Strong      |
|                       | 04. 2008 – 05. 2008 | Spring – Summer | Moderate    |
|                       | 06. 2008 – 09. 2009 | Summer – Fall   | Weak        |
| La Niña #2            | 08. 2010 – 08. 2010 | Summer – Summer | Weak        |
|                       | 09. 2010 – 10. 2010 | Fall – Fall     | Moderate    |
|                       | 11. 2010 – 01. 2011 | Winter – Winter | Strong      |
|                       | 02. 2011 – 03. 2011 | Winter – Spring | Moderate    |
|                       | 04. 2011 – 06. 2011 | Spring – Summer | Weak        |
|                       | 10. 2011 – 12. 2011 | Fall – Winter   | Weak        |
| La Niña #3            | 02. 2012 – 02. 2012 | Winter – Winter | Moderate    |
|                       | 03. 2012 – 04. 2012 | Winter – Spring | Weak        |

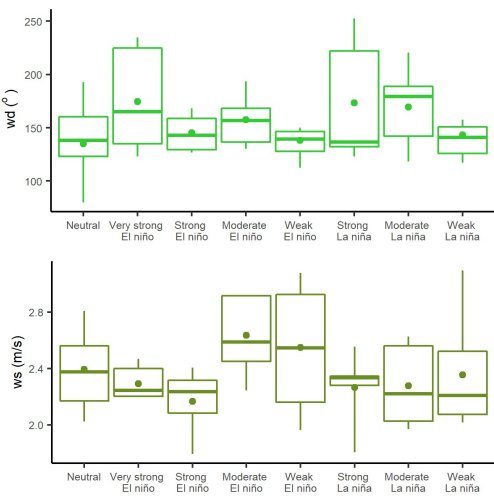

**Figure S12** – The changes of wind direction (top) and wind speed (bottom) under different levels of ENSO events.

**Table S7.** Summary of the multiple linear regression of the time series of gaseous and particles pollutants.

| Species                       | Coefficients <sup>1</sup> |                |               |               |                 |                  |                     |                |                  |              |                |                  |                |                 |
|-------------------------------|---------------------------|----------------|---------------|---------------|-----------------|------------------|---------------------|----------------|------------------|--------------|----------------|------------------|----------------|-----------------|
|                               | Year                      | Spring         | Summer        | Fall          | Temp            | RH               | Very strong El nino | Strong El nino | Moderate El nino | Weak El nino | Strong La nina | Moderate La nina | Weak La nina   | Intercept       |
| Gaseous pollutants            |                           |                |               |               |                 |                  |                     |                |                  |              |                |                  |                |                 |
| CO                            | <b>+21***</b>             | +3.1           | +21           | +96           | <b>-35***</b>   | +4.6             | +35                 | +130           | -12              | -28          | +21            | -24              | -46            | <b>+970***</b>  |
| SO <sub>2</sub>               | <b>-0.87***</b>           | +2.1           | +4.2          | +0.059        | -0.2            | -0.08            | -1.9                | -0.64          | -1.4             | +0.53        | <b>+4.4*</b>   | <b>+3.9*</b>     | <b>+4**</b>    | <b>+29***</b>   |
| NO <sub>x</sub>               | <b>-3.1***</b>            | <b>+17***</b>  | <b>+14*</b>   | -0.35         | <b>-3.3***</b>  | <b>+0.62*</b>    | +3.4                | <b>+21**</b>   | +2.7             | +4.9         | +11            | <b>+13*</b>      | +3.6           | <b>+130***</b>  |
| O <sub>3</sub>                | <b>+1.2***</b>            | <b>+6.8*</b>   | -3.8          | <b>+13**</b>  | +0.36           | <b>-0.92***</b>  | -0.39               | -2.5           | -3.1             | +0.83        | -0.69          | -1.8             | -1.6           | <b>+92***</b>   |
| Particle pollutants           |                           |                |               |               |                 |                  |                     |                |                  |              |                |                  |                |                 |
| PM <sub>2.5</sub>             | <b>-0.93***</b>           | <b>+6.5**</b>  | +1.1          | <b>+7.3*</b>  | <b>-0.82*</b>   | <b>-0.77***</b>  | -4.3                | -0.35          | +1               | +1.9         | <b>+16***</b>  | +4.6             | -2.2           | <b>+110***</b>  |
| SO <sub>4</sub> <sup>2-</sup> | -0.19                     | <b>+2.8**</b>  | +0.16         | <b>+3.9**</b> | -0.14           | <b>-0.2***</b>   | -1.8                | +0.027         | +0.69            | +0.23        | <b>+3.4*</b>   | <b>+2.8*</b>     | -0.32          | <b>+28***</b>   |
| NO <sub>3</sub> <sup>-</sup>  | <b>-0.16***</b>           | <b>+0.58*</b>  | +0.51         | +0.24         | <b>-0.15***</b> | -0.021           | -0.22               | +0.078         | +0.38            | -0.19        | <b>+2.1***</b> | <b>+0.76**</b>   | <b>-0.64**</b> | <b>+6.9***</b>  |
| NH <sub>4</sub> <sup>+</sup>  | -0.06                     | <b>+0.97**</b> | +0.39         | <b>+1.5**</b> | <b>-0.15**</b>  | <b>-0.071***</b> | -0.86               | -0.14          | -0.063           | -0.3         | <b>+1.6**</b>  | <b>+1.2**</b>    | -0.22          | <b>+12***</b>   |
| Al <sup>2</sup>               | <b>-10***</b>             | +50            | -35           | +15           | +3.3            | <b>-7***</b>     | -31                 | -49            | -14              | -0.59        | <b>+120**</b>  | +13              | <b>-51*</b>    | <b>+730***</b>  |
| Si <sup>2</sup>               | <b>-19**</b>              | +96            | -54           | +8.5          | +9.7            | <b>-17***</b>    | -37                 | +34            | -1.5             | +18          | <b>+330***</b> | +56              | -52            | <b>+1500***</b> |
| V <sup>2</sup>                | <b>-0.71*</b>             | <b>+16***</b>  | <b>+14**</b>  | +3.3          | -0.051          | +0.31            | -1.8                | -0.15          | +3.8             | +1.3         | +5.6           | +0.57            | -4             | -6.3            |
| Ni <sup>2</sup>               | <b>-0.29**</b>            | <b>+4.1***</b> | <b>+3.4**</b> | +1            | -0.031          | +0.057           | -0.1                | +0.48          | +1.7             | +0.77        | +1.7           | +0.32            | -1             | +1.9            |
| Pb <sup>2</sup>               | <b>-2.7***</b>            | +3.1           | -4.6          | +7.7          | -1.1            | <b>-2.3***</b>   | -13                 | -0.34          | +3.7             | -2.7         | <b>+29***</b>  | <b>+16*</b>      | -1.1           | <b>+260***</b>  |
| Zn <sup>2</sup>               | -5.3                      | +29            | -39           | +7.9          | -0.56           | <b>-6.1***</b>   | -57                 | -33            | -3.4             | -11          | +73            | +34              | -20            | <b>+690***</b>  |
| Cu <sup>2</sup>               | <b>-0.8**</b>             | +4.6           | -0.47         | +2.7          | -0.43           | <b>-0.71***</b>  | -4.3                | -0.56          | +0.46            | +1.7         | <b>+8.9*</b>   | +5.6             | -4.1           | <b>+87***</b>   |
| K <sup>+2</sup>               | <b>-27***</b>             | -23            | -82           | -6.4          | -11             | <b>-13***</b>    | -110                | -68            | -9.2             | <b>-97*</b>  | <b>+220**</b>  | +73              | -45            | <b>+1800***</b> |
| OC                            | -0.079                    | +0.27          | -0.77         | +0.088        | -0.11           | <b>-0.21***</b>  | -0.55               | -0.33          | -0.21            | -0.39        | <b>+3.3***</b> | +0.66            | -0.78          | <b>+26***</b>   |
| EC                            | <b>-0.15***</b>           | +0.19          | +0.31         | -0.025        | +0.0003         | -0.0091          | +0.02               | +0.14          | +0.088           | +0.22        | <b>+0.74**</b> | +0.067           | -0.029         | <b>+3.3***</b>  |
| Hopanes <sup>2</sup>          | <b>-0.045***</b>          | 0.069          | 0.012         | -0.078        | <b>-0.022*</b>  | <b>0.0069*</b>   | 0.011               | 0.17           | 0.13             | 0.088        | <b>0.26**</b>  | 0.051            | -0.071         | <b>0.57*</b>    |
| Levogluconan <sup>2</sup>     | +0.64                     | <b>-32***</b>  | -12           | -4.1          | <b>-4.6***</b>  | <b>-1.9***</b>   | +8.6                | -6.5           | +5.8             | +7.4         | <b>+61***</b>  | +12              | +7.6           | <b>+310***</b>  |

<sup>1</sup>Asterisks denote the coefficient of each variable significantly different from zero: \* p < 0.05, \*\* p < 0.01, \*\*\* p < 0.001. Coefficients significantly from zero are in bold.

<sup>2</sup>The concentration unit of labelled species is ng/m<sup>3</sup> and unit of the rest species is µg/m<sup>3</sup>.

## S8. Emissions controlling policies implemented in Hong Kong and in the PRD

**Table S8** – Summary of local and co-governments regulations/policies on local and regional emission controls in Hong Kong under Air Pollution Control Ordinance and in the Pearl River Delta under Guangdong Action Plan and related regulations.

| Type of emission      | Effective region <sup>1</sup> | Issue Year | Descriptions                                                                                                                         | Remarks (if any)                                                           |
|-----------------------|-------------------------------|------------|--------------------------------------------------------------------------------------------------------------------------------------|----------------------------------------------------------------------------|
| Vehicles <sup>2</sup> | Hong Kong (HK)                | 2007       | Replace pre-Euro & Euro I Diesel Commercial Vehicles (DCVs)                                                                          | By 30 <sup>th</sup> June 2013                                              |
|                       |                               | 2010       | Replace Euro II DCVs                                                                                                                 |                                                                            |
|                       |                               | 2010       | Tighten diesel and unleaded petrol vehicle to Euro V standard                                                                        |                                                                            |
|                       |                               | 2011       | The Statutory Ban – forbidden the stationary vehicles from operating engine for more than 3 minutes in any continuous 60 mins period | Completed in April 2014; about 13,900 taxis and 2,900 light buses involved |
|                       |                               | 2012       | Euro V emission standards for all newly registered vehicles                                                                          |                                                                            |
|                       |                               | 2013       | Voluntary replacement of catalytic converters and oxygen sensors on LPG vehicles                                                     |                                                                            |
|                       |                               | 2014       | Strengthen emission control for petrol and LPG vehicle                                                                               |                                                                            |
|                       |                               | 2014       | Phasing out pre-Euro IV DCVs                                                                                                         |                                                                            |
|                       |                               | 2015       | Trials on electric buses implement                                                                                                   |                                                                            |
|                       |                               | 2015       | Set up franchised bus low emission zone in Causeway Bay, Central and Mong Kok                                                        |                                                                            |
|                       | China                         | 2017       | Euro VI emission standards for all newly registered vehicles                                                                         | ~ 82,000 DCVs phased out                                                   |
|                       |                               | 2020       | Phasing out Euro IV DCVs                                                                                                             |                                                                            |
|                       |                               | 2021       | Tighten emission standards of first registered motorcycles, light buses and buses                                                    |                                                                            |
|                       |                               | (Proposed) |                                                                                                                                      |                                                                            |
|                       |                               | 2007       | China III emission standards for (1) light-duty vehicles & (2) compression ignition and gas fueled positive ignition engines         | By the end of 2027                                                         |
|                       |                               | 2009       | China III emission standards for heavy-duty vehicles                                                                                 |                                                                            |
|                       |                               | 2010       | China IV emission standards for (1) light-duty vehicles & (2) compression ignition and gas fueled positive ignition engines          |                                                                            |
|                       |                               | 2012       | China IV emission standards for heavy-duty vehicles                                                                                  |                                                                            |
|                       |                               | 2012       | China V emission standards for compression ignition and gas fuelled positive ignition engines                                        |                                                                            |
|                       |                               | 2014       | Eliminate the “yellow-label” car in Guangdong Province (GD)                                                                          |                                                                            |

|                         |                              |            |                                                                                                                                                                                                                                                                                                                                                                                                                                                                            |                                                                                                                                                                                                                                                                                                                                                                                                                                                                                                                                        |
|-------------------------|------------------------------|------------|----------------------------------------------------------------------------------------------------------------------------------------------------------------------------------------------------------------------------------------------------------------------------------------------------------------------------------------------------------------------------------------------------------------------------------------------------------------------------|----------------------------------------------------------------------------------------------------------------------------------------------------------------------------------------------------------------------------------------------------------------------------------------------------------------------------------------------------------------------------------------------------------------------------------------------------------------------------------------------------------------------------------------|
| Vehicles<br>(Cont'd)    | China                        | 2015       | China V emission standards for (1) light-duty vehicles; (2) light gasoline, light diesel & heavy diesel vehicles                                                                                                                                                                                                                                                                                                                                                           | Heavy diesel vehicles including buses, sanitation vehicles and postal trucks<br>Implement China 6a for Gas burning, buses and eventually all heavy-duty vehicles in 2019, 2020 and 2021, respectively.<br>Implement China 6b for gas burning and eventually all heavy-duty vehicles in 2021 and 2023 respectively.<br>Implement China 6a on 1 <sup>st</sup> July 2020.<br>Implement China 6b on 1 <sup>st</sup> July 2023                                                                                                              |
|                         |                              | 2019       | China VI emission standards for heavy-duty vehicles                                                                                                                                                                                                                                                                                                                                                                                                                        |                                                                                                                                                                                                                                                                                                                                                                                                                                                                                                                                        |
|                         |                              | 2020       | China VI emission standards for light-duty vehicles                                                                                                                                                                                                                                                                                                                                                                                                                        |                                                                                                                                                                                                                                                                                                                                                                                                                                                                                                                                        |
| Marine emission         | HK                           | 2008       | Regulations on O <sub>3</sub> depleting substances, NO <sub>x</sub> , SO <sub>x</sub> , VOC emission, fuel oil quality and shipboard incineration.                                                                                                                                                                                                                                                                                                                         |                                                                                                                                                                                                                                                                                                                                                                                                                                                                                                                                        |
|                         |                              | 2015       | Ocean going vessel terminated in HK need to switch to <0.5% Sulfur content LPG and other approved fuel                                                                                                                                                                                                                                                                                                                                                                     |                                                                                                                                                                                                                                                                                                                                                                                                                                                                                                                                        |
|                         | HK + Pearl River Delta (PRD) | 2019       | Air pollution control (Fuel for Vessels) Regulation implement – All marine vessels are required to use compliant fuel within HK and PRD waters                                                                                                                                                                                                                                                                                                                             |                                                                                                                                                                                                                                                                                                                                                                                                                                                                                                                                        |
| Power plant             | HK                           | Since 1997 | New Coal-fired generating unit by two power companies                                                                                                                                                                                                                                                                                                                                                                                                                      | Two new gas-fired units will be operated in the two power companies in 2023, proportion of gas generation will reach 57%.<br>Reduce those pollutants by around 60-80% by 2022 onwards with 2010 as starting year.<br>Reduce energy intensity by 40% by 2025<br>T·Park (sludge treatment facility) in 2015 (rename in 2016),<br>O·Park (Food waste) in 2014,<br>South-east and West New Territories landfill gas (e.g. CH <sub>4</sub> ) in 2017.<br>To encourage development of renewable energy, promotion of energy efficiency, etc. |
|                         |                              | 2008       | Fuel Mix Target – Around 50% of the fuel mix for electricity generation is local gas generation.                                                                                                                                                                                                                                                                                                                                                                           |                                                                                                                                                                                                                                                                                                                                                                                                                                                                                                                                        |
|                         |                              | 2008-2017  | Issue a Technical Memorandum as guideline on emission caps for sulfur dioxide, nitrogen oxides and respirable suspended particulates (PM <sub>10</sub> )                                                                                                                                                                                                                                                                                                                   |                                                                                                                                                                                                                                                                                                                                                                                                                                                                                                                                        |
|                         |                              | 2015       | Energy Saving Plan                                                                                                                                                                                                                                                                                                                                                                                                                                                         |                                                                                                                                                                                                                                                                                                                                                                                                                                                                                                                                        |
|                         |                              | 2015-2017  | State-of-the-art waste-to-energy projects                                                                                                                                                                                                                                                                                                                                                                                                                                  |                                                                                                                                                                                                                                                                                                                                                                                                                                                                                                                                        |
|                         |                              | 2018       | Scheme of Control Agreements with two power companies                                                                                                                                                                                                                                                                                                                                                                                                                      |                                                                                                                                                                                                                                                                                                                                                                                                                                                                                                                                        |
| Power plant<br>(Cont'd) | GD                           | 2014       | Nuclear power plants operation with > 9.6 million kW, proportion of non-fossil fuel energy reach > 20% in GD province<br>Increase electricity transfer from other provinces<br>Replace coal-power plants with < 100,000 kW capacity with clean energy in PRD<br>Emission control on PM <sub>2.5</sub> in Thermal Power Plant Air Pollutant Emission Standard, NO <sub>x</sub> by low NO <sub>x</sub> combustion technologies, SO <sub>2</sub> by desulfurization facility. | By 2017                                                                                                                                                                                                                                                                                                                                                                                                                                                                                                                                |
|                         |                              | 2019       | Regulations on energy consumptions/emitted pollutions including forbidden on building/extending the coal-fired thermal power or captive power station, coal                                                                                                                                                                                                                                                                                                                | By 2017                                                                                                                                                                                                                                                                                                                                                                                                                                                                                                                                |

|             |       |      |                                                                                                                                                                                                                                                           |                                                                                                               |
|-------------|-------|------|-----------------------------------------------------------------------------------------------------------------------------------------------------------------------------------------------------------------------------------------------------------|---------------------------------------------------------------------------------------------------------------|
|             |       |      | consumption control, promotion on clean energy, restrict high pollution boilers/furnaces, etc.                                                                                                                                                            |                                                                                                               |
| Dust        | HK    | 1974 | Total emission of dust and grit cannot exceed 0.5%/1.0% of total fuel fired in furnace, oven, or industrial plant with burning rate more/less than 1000 kg per hour                                                                                       |                                                                                                               |
|             |       | 1997 | Regulations on construction dust including air pollution control system in construction sites, stockpiling of dusty materials, debris handling, excavation or earth moving, etc.                                                                          |                                                                                                               |
|             | China | 2008 | Technical Specifications for Urban Fugitive Dust Pollution Prevention and Control                                                                                                                                                                         |                                                                                                               |
|             |       | 2017 | Promotion of prefabricated building on control of construction dust                                                                                                                                                                                       | By 2020, coverage of prefabricated building in district and prefecture area for > 15% and >10% , respectively |
|             | GD    | 2019 | Regulations on construction dust including air pollution control system in construction sites, debris handling, monitoring via satellite systems, etc.                                                                                                    |                                                                                                               |
| Industrial  | GD    | 2009 | “Double Transfer” policy – Transfer labor-intensive industries from PRD to less developed regions of the province and subsequent transfer rural labor to the local secondary and tertiary industries or to the PRD region from the primary local industry |                                                                                                               |
|             |       | 2012 | Industrial Boiler Pollution Control Work Plan – replace with clean energy/ convert into central heating                                                                                                                                                   |                                                                                                               |
|             |       | 2019 | Emission standards of PM <sub>2.5</sub> , SO <sub>2</sub> , NO <sub>x</sub> on (1) steel and cement & (2) petrochemical industries                                                                                                                        |                                                                                                               |
| Residential | GD    | 2014 | Forbidden to burn specific fuel including direct burning of biomass in urban districts. Forbidden to burn diesel, kerosene, artificial gas and other gas which beyond emission limit.                                                                     |                                                                                                               |

<sup>1</sup> Here the regulations considered are those under Air Pollution Control Ordinance for Hong Kong and those under Guangdong Action Plan and related regulations in the Pearl River Delta. and in force in 2009 and repealed in 2019.

<sup>2</sup> Only regulations/policies on and after 2007 are listed.
