# Supplementary material for: Measurement Report: Ten-year trend of PM 2.5 major components and source tracers from 2008 to 2017 in an urban site of Hong Kong, China
Source: Copernicus journal article supplement (doi:10.5194/acp-2022-100), 2022-03-07
Supplement: Supplementary file [file acp-2022-100-AC2-supplement.pdf]

## **Anonymous Referee #2**

### **General comments**

*The manuscript presents a ten-year data set of PM<sub>2.5</sub> major components and source-specific tracers at an urban site in Hong Kong, South China. The authors investigate the trends of these compounds and evaluate the influence of emission control on their variations. They also discuss the impact of ENSO events on the abnormal change in PM<sub>2.5</sub> components, especially in 2011. Overall, I think the research is quite interesting and valuable to the community. I recommend the manuscript to be published in the journal after considering the following specifics:*

**Response:** Thank you for the positive comments. Our response to the comments is given in the following. The response text is marked in blue. References cited in this response document are placed at the end.

### **Major concerns:**

- 1) *There should be emission inventory data in Hong Kong and the PRD. If so, the authors are suggested to compare the long-term trends of PM<sub>5</sub> species (tracers) with the variations of local and regional emission inventories. For example, when the authors discuss the long-term variations of SO<sub>2</sub> and EC, they list the major emission control measures implemented in Hong Kong (Figure 7 and 8, respectively). Are the changes in these species consistent with the variations in emission inventories in Hong Kong?*

**Response:** We agree with the reviewer that a comparison of the inventory emission data and ambient concentrations would be informative, as one of the data objectives for ambient monitoring is to verify the effectiveness of control measures, thus the broad accuracy of the emission inventories. However, emission is only one of the many factors affecting the ambient concentration of a pollutant. The link between emission and ambient concentration is further complicated by atmospheric transformation processes for secondary pollutant (e.g., sulfate). It is beyond the scope of this study to provide a full examination and comparison between the trends of the emission inventory data and ambient concentrations, which will need emission-based air quality modeling work. Additionally, emission inventories for speciated PM are generally not available. For example, there is no EC Emission inventory available for Hong Kong.

We note that SO<sub>2</sub> emission Inventories are available for both Hong Kong and the Guangdong province. As an illustration of comparison between emission inventories and ambient measurements, we now expand the discussion of 10-year trend of sulfate by inclusion of the emission inventory data for SO<sub>2</sub>. We extracted the long-term emission inventories for Hong Kong and Guangdong from the HKEPD website ([https://www.epd.gov.hk/epd/english/environmentinhk/air/data/emission\\_inve.html](https://www.epd.gov.hk/epd/english/environmentinhk/air/data/emission_inve.html)) and the MEIC data platform (version 1.3, [http://meicmodel.org/?page\\_id=541&lang=en](http://meicmodel.org/?page_id=541&lang=en)).

Figure R1 shows the emission inventories of SO<sub>2</sub> for Guangdong and Hong Kong. The top two sources for SO<sub>2</sub> emissions in Hong Kong are power plants and marine vessels while the major SO<sub>2</sub> sources in Guangdong are power plants and industries. The emission and ambient concentration trends, normalized to 2018, are examined in Figure R1(c), showing that the yearly variation of ambient SO<sub>2</sub> concentrations at the study site (TW AQMS) was very similar to the total SO<sub>2</sub> emission trend from Hong Kong and SO<sub>2</sub> emission from power plants in Guangdong.

There was a notable reduction of emissions from power plants in Hong Kong in 2010 owing to the emission caps stipulated by the first Technical Memorandum issued by the HKEPD. A range of marine control measures since 2014 further reduce the SO<sub>2</sub> emissions from marine vessels. The regulation toward shipping industry on switching the low-sulfur content fuel for vessels entering Hong Kong helped in reducing extra 18% (-2920 tons) SO<sub>2</sub> emissions from navigation sector in 2016 (Figure R2b).

In Guangdong, the drop of SO<sub>2</sub> emissions begin in 2012, mainly due to the reduced contribution of power plant and industrial sources (Figure R2a). Overall, the changes in SO<sub>2</sub> concentrations during the 10-year period are consistent with the SO<sub>2</sub> emissions estimated for the GBA.

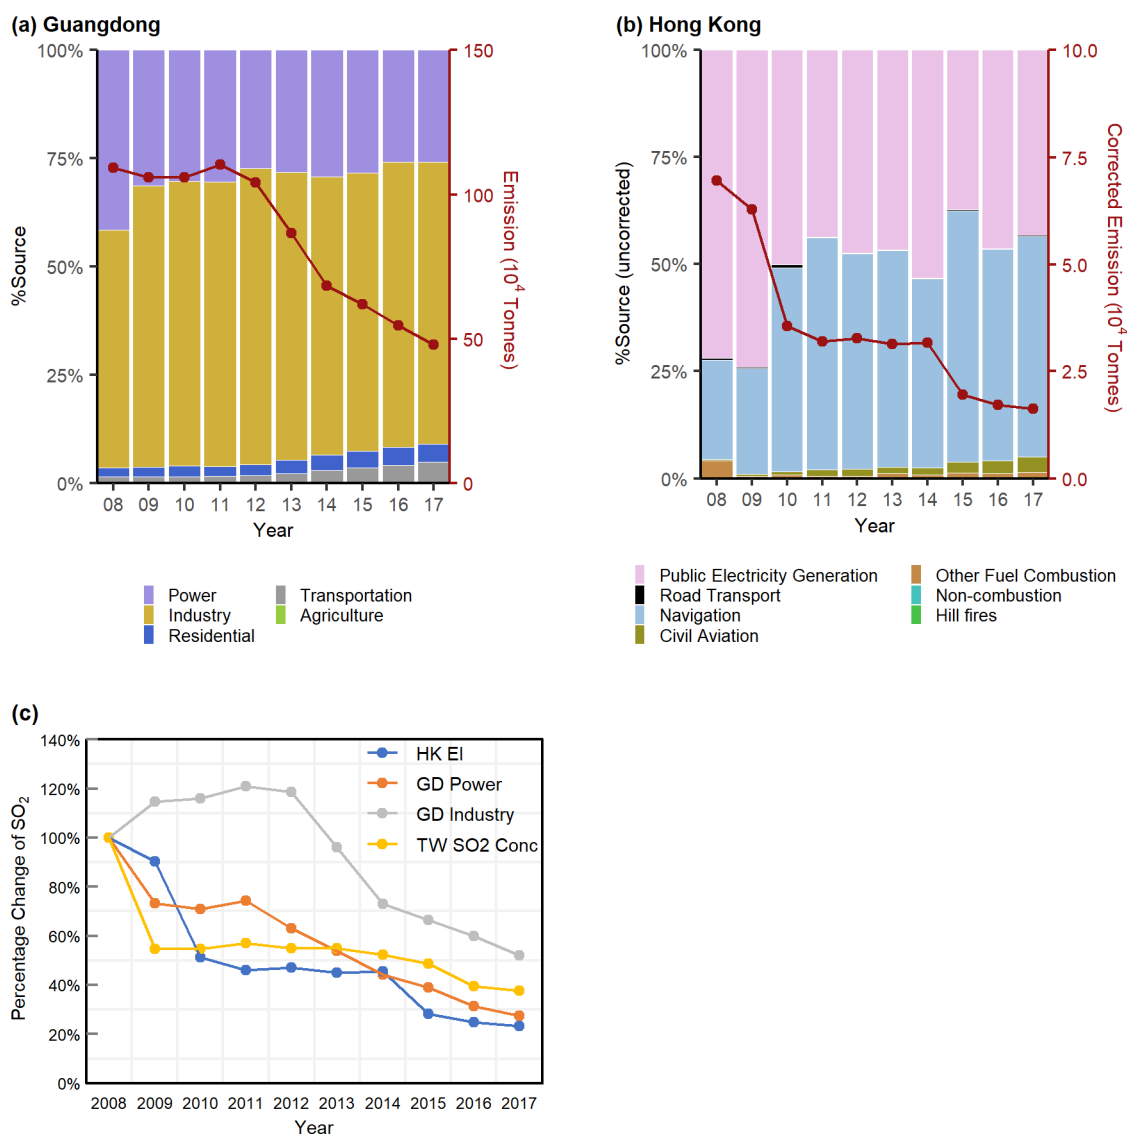

**Figure R1 (new Figure S8).** The ten-year changes in percentage share of emissions by sources (columns) and the variations in total SO<sub>2</sub> emissions (solid red line) in (a) Guangdong and (b) Hong Kong, with (c) comparing the ten-year trends of ambient SO<sub>2</sub> at TW and major emission sources of SO<sub>2</sub> in Hong Kong and Guangdong for the period of 2008-2017.

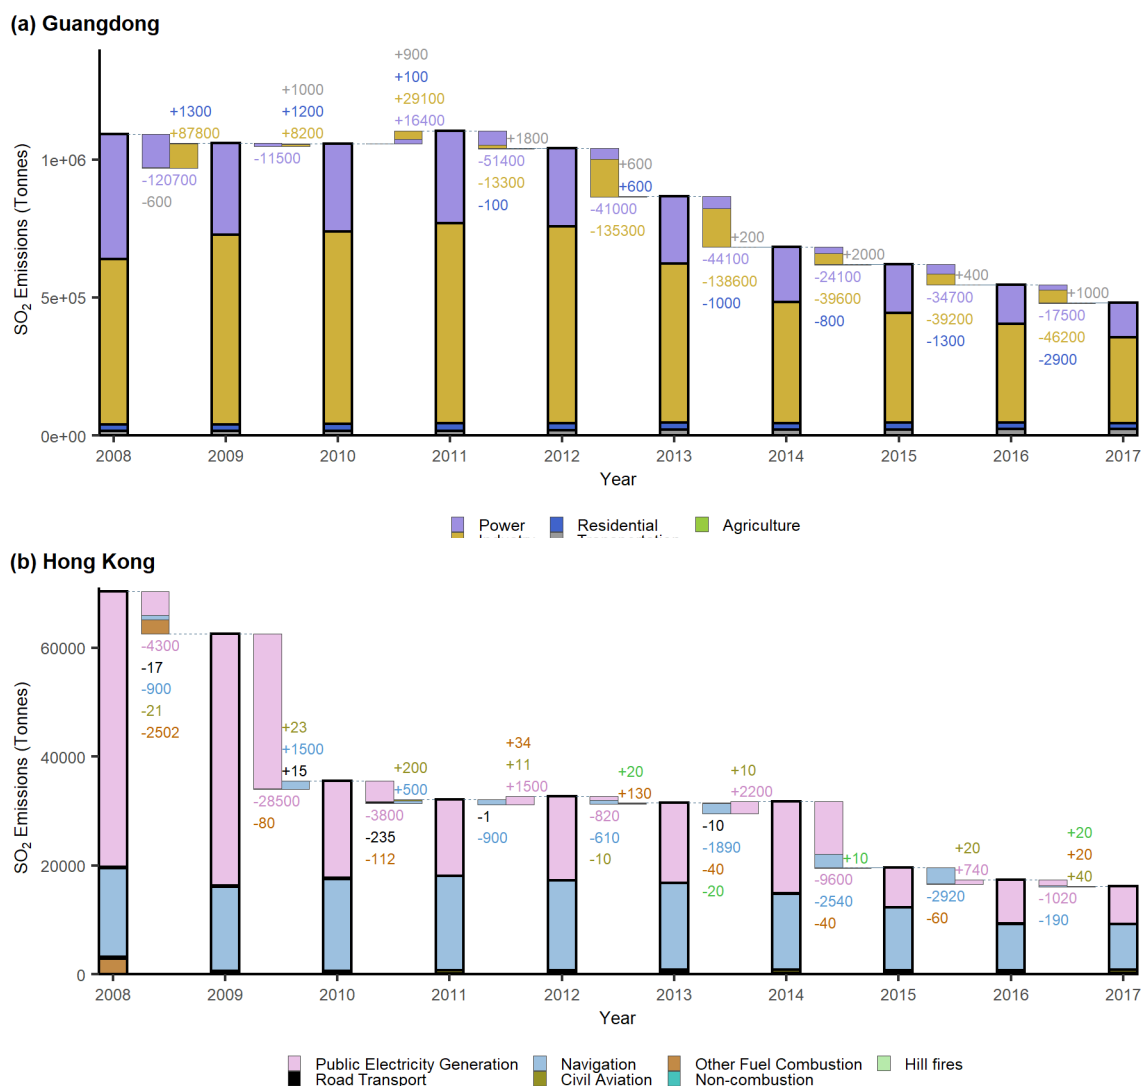

**Figure R2 (new Figure S9).** The changes in the emissions from individual source sectors in (a) Guangdong and (b) Hong Kong.

The following text is added in main manuscript as supportive information linking the trend in ambient SO<sub>2</sub> ambient concentration with the data based on emission inventories:

Lines 353-361:

“As a criteria gaseous pollutant, SO<sub>2</sub> has been extensively studied and its emission inventories for Hong Kong and Guangdong province are available (HKEPD, 2021b; Li et al., 2017; Zheng, 2018). The SO<sub>2</sub> emission inventory data for our study decade are shown in Section S3 in Supplementary information. The top two sources for SO<sub>2</sub> emissions in Hong Kong are power plants and marine vessels while the major SO<sub>2</sub> sources in Guangdong are power plants and industries (Figure S8). The emission and ambient concentration trends of SO<sub>2</sub>, normalized to 2018, are examined in Figure S8c, showing that the yearly variation of ambient SO<sub>2</sub> concentrations at TW was similar to the total SO<sub>2</sub> emission trend from Hong Kong and SO<sub>2</sub> emission from power plants in Guangdong. Overall, the changes in ambient SO<sub>2</sub> concentrations at TW during the 10-year period are consistent with the SO<sub>2</sub> emissions estimated for the GBA.”

A new section (Section S3) is added to the SI file, showing Figures R1 and R2 and briefly describing the SO<sub>2</sub> emission inventories in Hong Kong and Guangdong.

- 2) *Recent studies have demonstrated that organic compounds, such as levoglucosan and hopanes, are not stable in the atmosphere as previously thought. As Table 2 shows, the levels of ozone continue to increase at the site. This implies that the atmospheric oxidation capacity is increasing. The authors should add some discussion about the influence of the increase in oxidation capacity on the decrease of organic species.*

**Response:** Our monitoring location (TW AQMS) is in an urban environment. The increasing trend of O<sub>3</sub> (+4.6% yr<sup>-1</sup> in winter and +2.6% yr<sup>-1</sup> in summer) at this site is mostly accounted for by the attenuated NO<sub>x</sub> titration since NO<sub>x</sub> has continuously been dropping at a rate of ca. -3% yr<sup>-1</sup>. We calculated O<sub>x</sub> (= O<sub>3</sub> + NO<sub>2</sub>) at TW site to characterize the atmospheric oxidation capacity (AOC) and found that the AOC over the 10-year period show little discernable change. Nevertheless, we agree with the reviewer that the oxidation capacity of the atmosphere would have impact on the species concentrations. However, the low-resolution nature of our organic tracer data (i.e., daily average), is ill-suited to ascertain the impact of changing atmospheric oxidative capacity on organic degradation rate, and further on concentration levels of the organic markers (e.g., levoglucosan and hopanes).

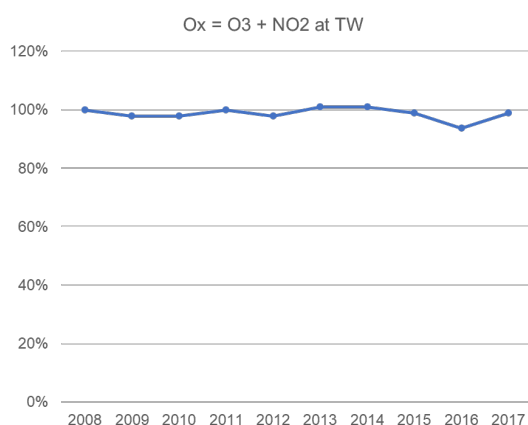

**Figure R3.** Ten-year variation of O<sub>x</sub> (=O<sub>3</sub>+NO<sub>2</sub>), shown as the normalized percentage against the level in 2008, at monitoring site in the urban environment of Hong Kong

The effect of oxidation capacity changes on degradation remain unclear from the analysis of measurement data. To keep the paper concise and our focus on reporting the temporal variation, we add one sentence to mention the possible influence of oxidation.

Line 445-447:

“We also acknowledge that the ten-year trend in an organic tracer like levoglucosan could be affected by long-term change in atmospheric oxidation capacity, which would exert its impact through atmospheric degradation kinetics.”

- 3) *In section “3. 4 Secondary inorganic aerosol components”, the authors discuss the uneven reduction of SO<sub>2</sub>-sulfate and NO<sub>x</sub>-nitrate. How about the temporal trends of sulfur oxidation rate (SOR) and nitrogen oxidation rate (NOR)? The changes in SOR and NOR might provide additional information about the formation chemistry of sulfate and nitrate.*

**Response:** Thank you for the suggestions. We calculated the SOR and NOR in winter and summer using Eq. (R1). The 10-year variations of these two ratio quantities are shown in Figure R4.

$$SOR = \frac{nSO_4^{2-}}{nSO_4^{2-} + nSO_2} ; NOR = \frac{nNO_3^-}{nNO_3^- + nNO_2} \quad \text{where } n \text{ refer to molar concentration} \quad (R1)$$

The SOR value was higher than 0.1 for our data in all years, indicating the significant oxidation and in

line with the large regional transport contribution for sulfate. In the transformation of SO<sub>2</sub> to sulfate, multiple oxidants could be at work (e.g, gaseous OH, H<sub>2</sub>O<sub>2</sub>(aq), O<sub>3</sub>(aq), etc) (Xue et al., 2019). The aqueous oxidation mechanisms are likely not closely coupled with gaseous oxidation capacity. Additionally, the aqueous pathways are dependent on cloud availability. As shown in Figure R5, no clear co-variation temporal patterns can be discerned for ozone and sulfate. This result, although crude, reflects that a straightforward linkage is absent between one of the gaseous oxidants (i.e., O<sub>3</sub>) and sulfate as an oxidation product of SO<sub>2</sub>.

The NOR value was typically low (< 0.05) (Figure R4). Note that PM<sub>2.5</sub> nitrate is only one part of the oxidation products of NO<sub>x</sub>. Other forms of nitrate, such as gaseous HNO<sub>3</sub>, nitrate on coarse particles, organic nitrates, etc., were not reflected in the NOR calculation, but they could be comparable in abundance to PM<sub>2.5</sub> nitrate. Additionally, PM<sub>2.5</sub> nitrate (mainly in the form of ammonium nitrate) is semi-volatile and its partition in the particle phase is strongly affected by temperature and relative humidity. For example, the stack difference NOR between summer and winter is more likely driven by temperature. As such, we feel using NOR to indicate formation pathway is not well-grounded.

In summary, the complex oxidation chemistry of SO<sub>2</sub> to sulfate, and the multiple significant forms of nitrate plus the semivolatile nature of ammonium nitrate make the SOR and NOR quantities not readily indicative for formation chemistry insights. Thus, we decide not to explore these two ratios in our manuscript.

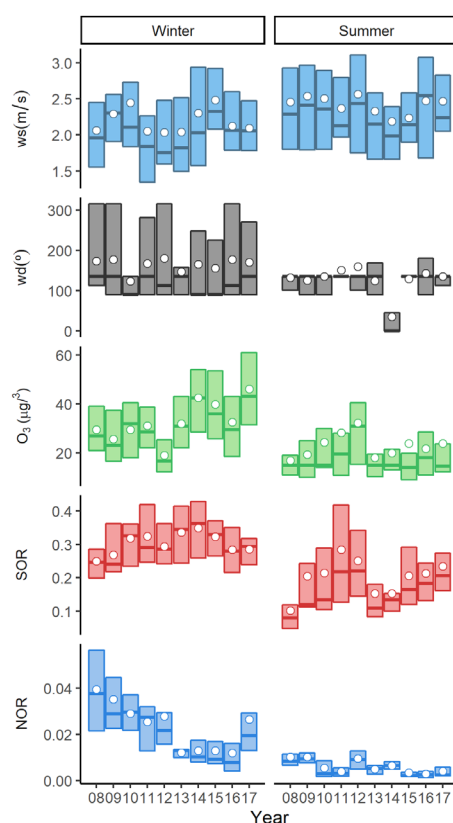

**Figure R4.** The seasonal variation of meteorological condition (wind speed and wind direction), ozone, SOR and NOR (from top to bottom).

**Minor comments:**

- 1) Page 8 line 233-234. The authors state that the decrease in EC is due to local control of vehicular emissions. However, in addition to vehicular emissions, EC could be emitted from biomass burning and shipping exhaust. In fact, the tracers of the latter two sources (e.g., K<sup>+</sup> and Ni) also continued to decrease (Table 2). The “%Relative change” of EC is close to that of K<sup>+</sup>.

**Response:** Thank you for the question. Generally speaking, the review is correct that combustion sources, such as vehicular emissions, biomass burning, and ship emissions, all contribute to EC. For our study location, these three sources mentioned by the reviewer have distinct seasonality. Vehicular and shipping emissions are mainly of local origin, thus showing little seasonality. Biomass burning is largely regional/super-regional, displaying clear seasonality of higher in the winter and lower in the summer.

Here, we use season-specific Sen's slope to compare the seasonality and thus verify the origin of emission sources with clustering results of the correlation matrix. The closer the season-specific Sen's slope between winter and summer, the more contribution of local sources to the species. EC shows a comparable Sen's slope of  $-0.19 \mu\text{g m}^{-3} \text{yr}^{-1}$  in winter and  $-0.18 \mu\text{g m}^{-3} \text{yr}^{-1}$  in summer, indicating the strong local source contribution in EC. Ni also has similar Sen's slope values in winter and in summer ( $-0.37$  and  $-0.42 \text{ng m}^{-3} \text{yr}^{-1}$ ). On the other hand,  $\text{K}^+$  has a much higher Sen's slope in winter than in summer ( $-62$  vs.  $-11 \text{ng m}^{-3} \text{yr}^{-1}$ ). Although the %relative change of EC is close to that of  $\text{K}^+$ , their overall temporal and seasonal variation were quite different from each other. In addition, EC had moderate to good correlations ( $R$ -values: 0.41-0.74) with species which are emitted/generated locally such as hopanes (tracer for vehicular emissions) and  $\text{NO}_x$  but was poorly correlated with  $\text{K}^+$  ( $R$ -value: 0.19). Our source apportionment study for data in 2015 shows that ship emissions make negligible contributions to EC at TW (See Table S4b in Chow et al., 2022). In conclusion, the relevant monitoring data strongly indicates EC at TW was mainly from local vehicular emissions and its reductions over the years were in excellent correspondence to local vehicular emission control measures.

2) *Page 12 Figure 5. SO<sub>2</sub> had a local source in 2008 but a regional source in 2017. What is the explanation?*

**Response:** Thanks for your comment. We computed the spearman correlation between species in each year to examine and to preliminary classify the sources into local and regional groups by hierarchical clustering. The correlation of  $\text{SO}_2$  with species of local origins such as EC, V and Ni became relatively poor in 2017 whilst the correlation with regional species such as Zn and  $\text{K}^+$  increased in the same year (Figure R7). We believe it is because the local  $\text{SO}_2$  emissions have been greatly reduced since 2010, when the emission caps for power plants in Hong Kong came into effect, so that the regional transport of  $\text{SO}_2$  began to play a relatively more important role.

In addition, the annual percentage changes of ambient  $\text{SO}_2$  was similar to those from local emission inventory in the beginning years (2008-2010) (ambient: -45%, inventory: -49%), but was lower than local emission inventories in the ending year (2008-2017) (ambient:-62%, inventory:-77%). This further supports that there is a shift of dominant emissions source of  $\text{SO}_2$  from local to regional/super-regional over the decade. The below text is added to comment on the shifting of  $\text{SO}_2$  dominant sources over the decade.

Lines 313-315

“It is of interest to note that  $\text{SO}_2$  shifted from the local cluster to the regional cluster over the decade, reflecting the changing relative importance of local vs. regional emission sources of  $\text{SO}_2$  over the years (see Section S3 for more details).”

3) *Page 19 Table 4. The coefficients in WINTER are not listed in Table 4.*

**Response:** Table 4 lists the regression coefficients for the variables in the multiple linear regression Eq. (4).

$$X_m = \beta_1 \text{Year}_m + \delta_1 \text{Season}_m + \beta_2 \text{Temp}_m + \beta_3 \text{RH} + \delta_2 \text{ENSO} \quad (4)$$

In Equation (4), there are three parametric variables (Year, Temperature, and RH) and two categorical (or dummy) variables (Season and ENSO event). The coefficients for the categorical variables are derived by selecting one of the categories as the reference (i.e., winter in our case) and calculating the

relative values of each variable with respect to the reference. Hence there is no coefficient for winter in the table. This explanation is now added as part of the table footnote. As Table 4 data is a portion of Table S7, we now deleted Table 4 from the main text (the explanation for no coefficient for winter is added as Table S7 footnote). Related to Table 4 data, we also create a new Figure (Figure S15), visually showing the varying magnitude of the effect of Strong La Niña event on various gaseous and particle species.

#### References:

Chow, W. S., Huang, X. H. H., Leung, K. F., Huang, L., Wu, X., and Yu, J. Z., 2022. Molecular and elemental marker-based source apportionment of fine particulate matter at six sites in Hong Kong, China. *Sci. Total Environ.*, 813, 152652.

Xue, J., Yu, X., Yuan, Z., Griffith, S.M., Lau, A.K., Seinfeld, J.H. and Yu, J.Z., 2019. Efficient control of atmospheric sulfate production based on three formation regimes. *Nature Geoscience*, 12, 977-982.
